# Supplementary material for: Preparation and Surface Properties Study of Novel Fluorine-Containing Methacrylate Polymers for Coating
Source: PubMed Central journal article supplement (PMC6266613; doi:10.3390/ma11112258), 2018-11-13
Supplement: materials-11-02258-s001.pdf [file materials-11-02258-s001.pdf]

# Supporting Information

Copies of  $^1\text{H}$  NMR,  $^{19}\text{F}$  NMR,  $^{13}\text{C}$  NMR and GPC

1. Compound 4: Perfluoro-2-methyl-2-pentanol:  $\text{F}_5\text{-HO}$  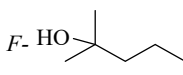

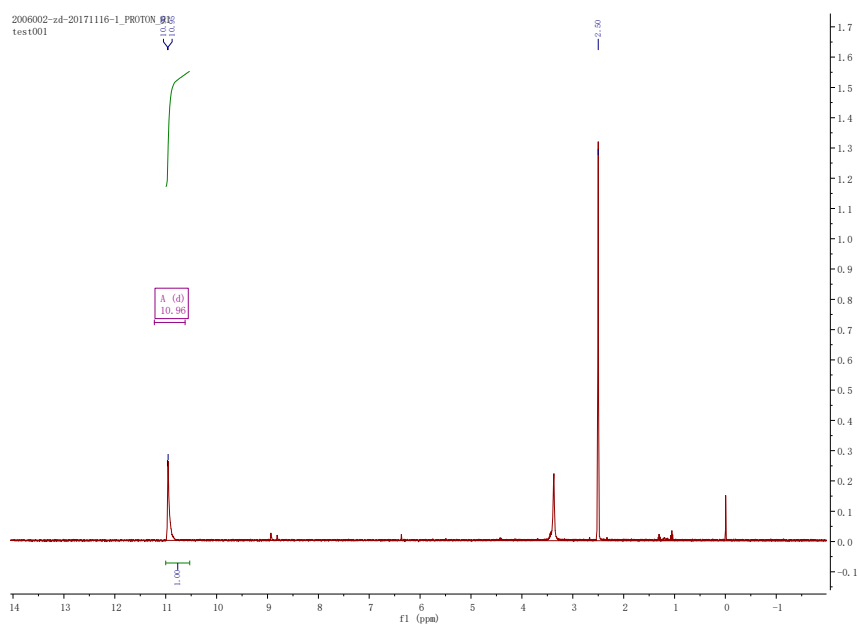

Figure S1.  $^1\text{H}$  NMR (DMSO- $d_6$ , 400 MHz).

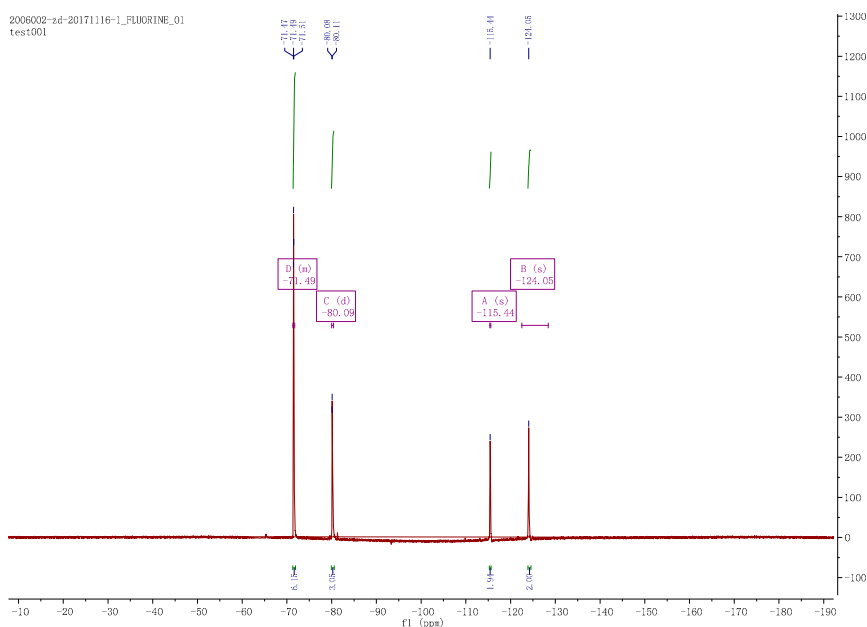

Figure S2.  $^{19}\text{F}$  NMR (DMSO- $d_6$ , 376 MHz).

## 2. Compound 5

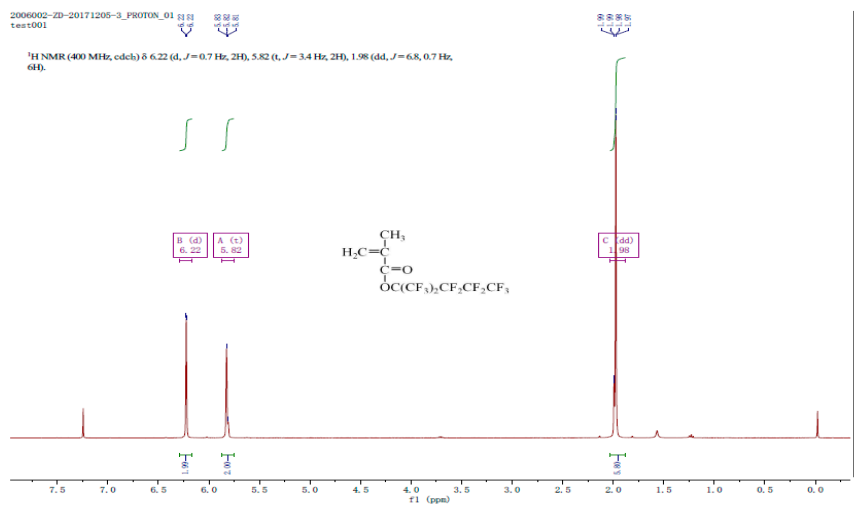

Figure S3. <sup>1</sup>H NMR (CDCl<sub>3</sub>, 400 MHz).

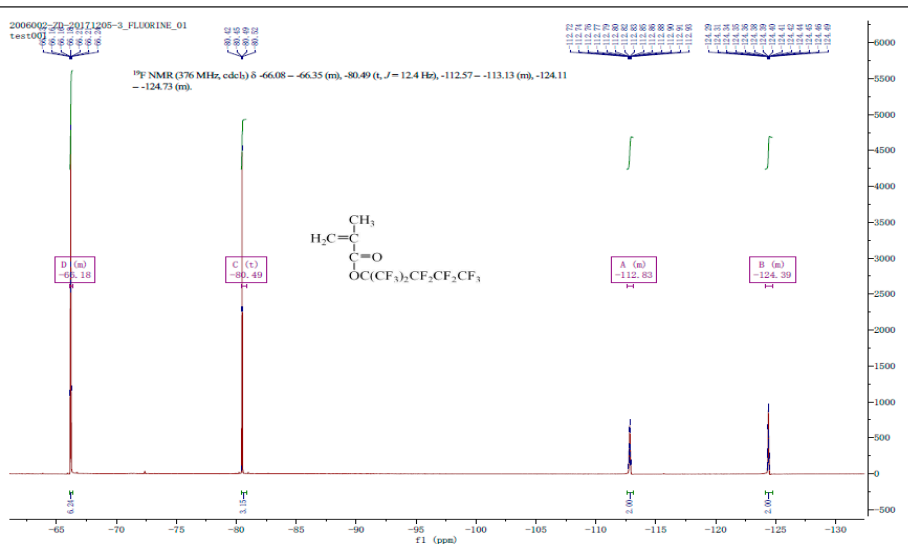

Figure S4. <sup>19</sup>F NMR (CDCl<sub>3</sub>, 376 MHz).

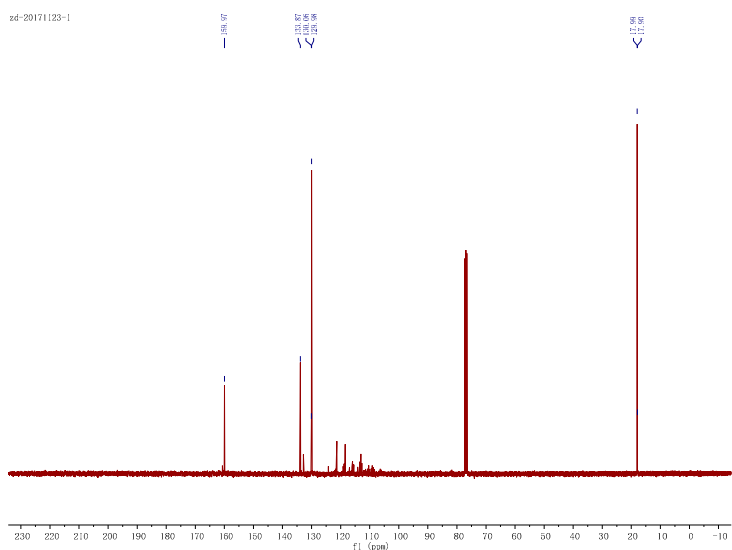

Figure S5. <sup>13</sup>C NMR (101 MHz, CDCl<sub>3</sub>).

### 3. Compound of Poly (5-co-BMA) (1:1)

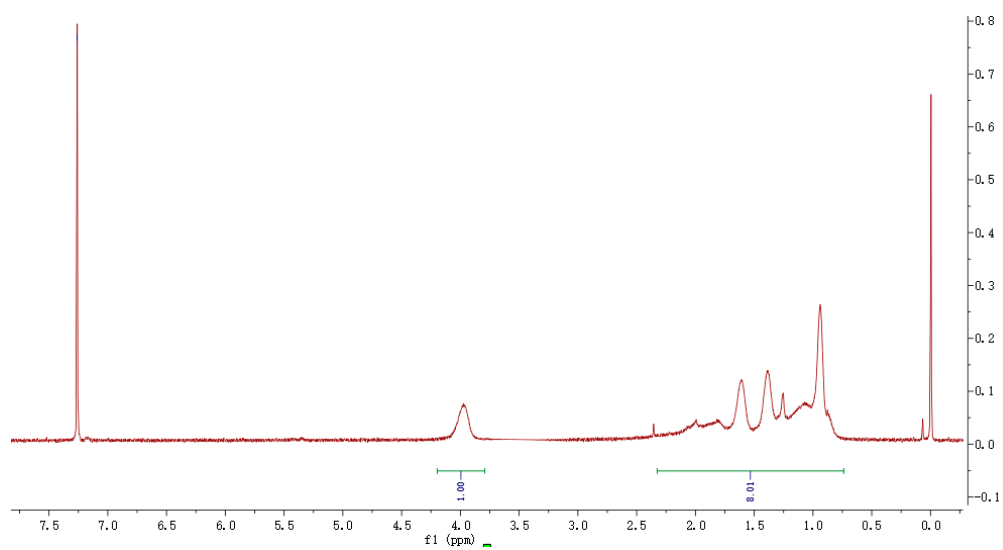

Figure S6.  $^1\text{H}$  NMR ( $\text{CDCl}_3$ , 400 MHz).

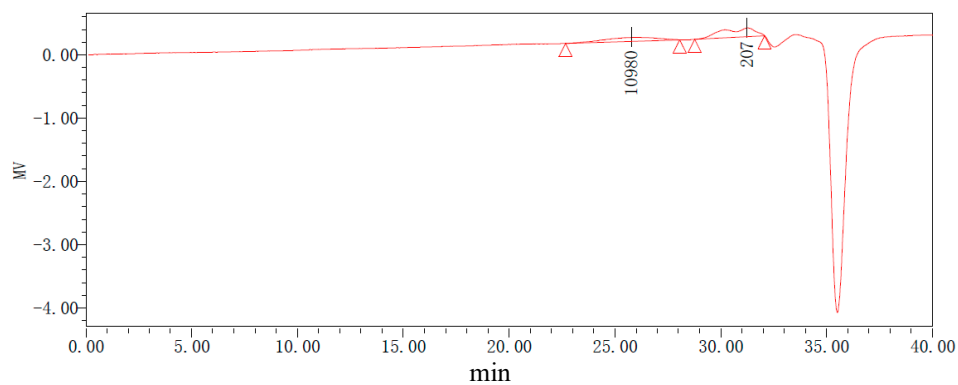

Table S1. GPC results.

| $M_n$ (D) | $M_w$ (D) | MP    | $M_z$ (D) | $M_z + 1$ (D) | PDI      |
|-----------|-----------|-------|-----------|---------------|----------|
| 10686     | 13028     | 16043 | 10980     | 19471         | 1.219122 |

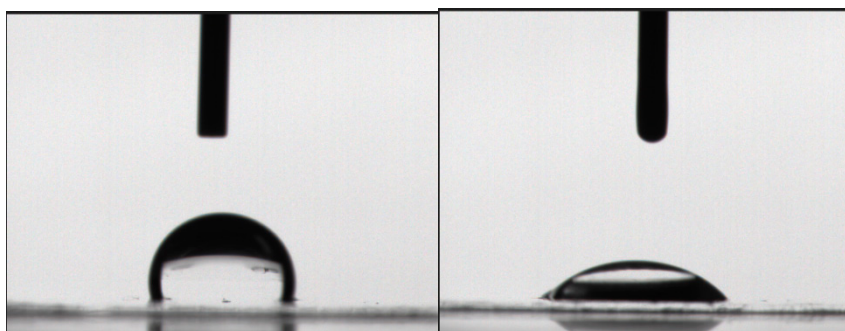

Figure S7. Contact Angle with Water and n-Hexadecane.

#### 4. Compound of Poly (5-co-BMA) (1:2)

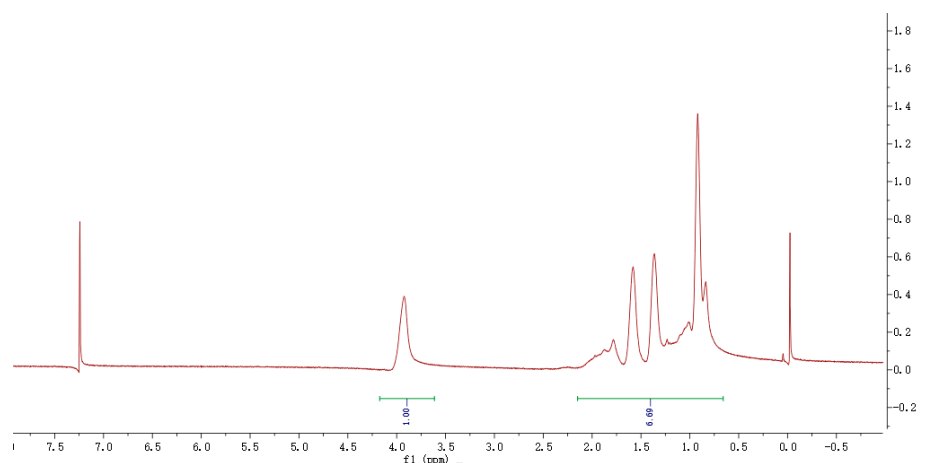

Figure S8.  $^1\text{H}$  NMR ( $\text{CDCl}_3$ , 400 MHz).

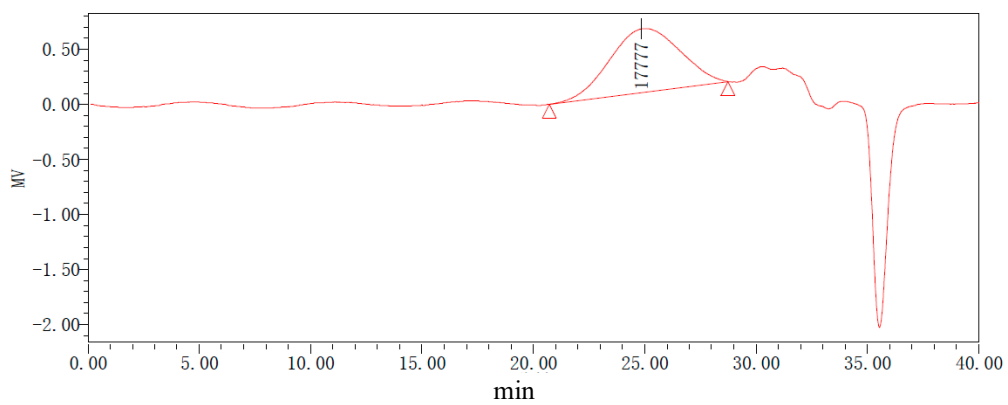

Table S2. GPC results.

| $M_n$ (D) | $M_w$ (D) | MP    | $M_z$ (D) | $M_z + 1$ (D) | PDI      |
|-----------|-----------|-------|-----------|---------------|----------|
| 14094     | 20170     | 17777 | 28824     | 39443         | 1.431164 |

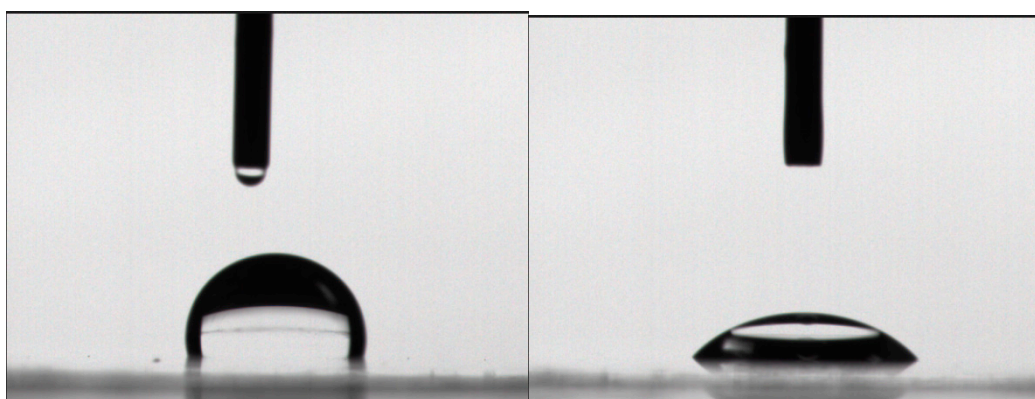

Figure S9. Contact Angle with Water and n-Hexadecane.

5. Compound of Poly (5-co-BMA) (1:6)

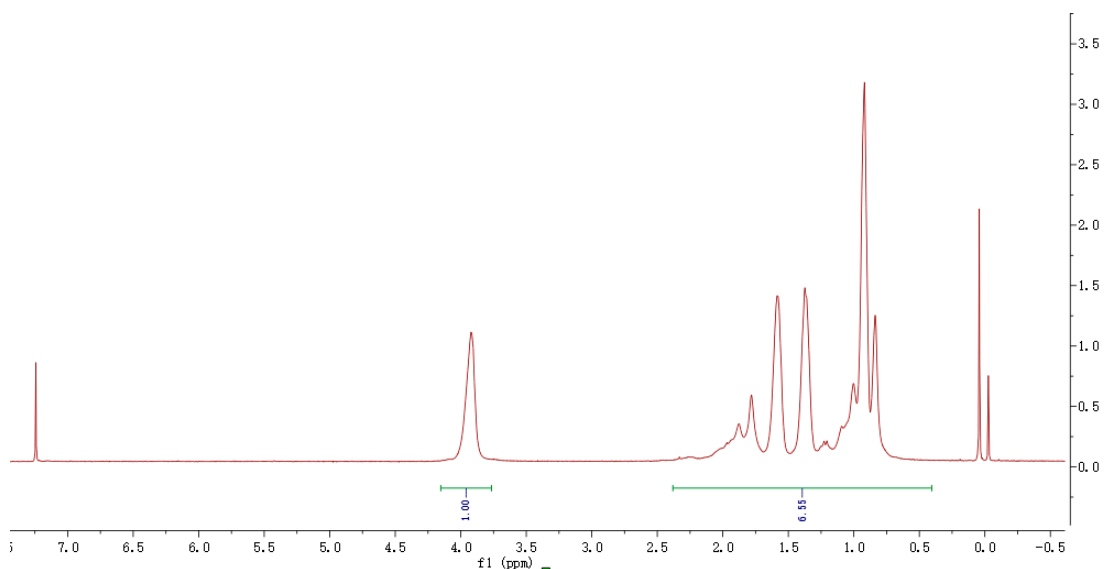

Figure S10. <sup>1</sup>H NMR (CDCl<sub>3</sub>, 400 MHz).

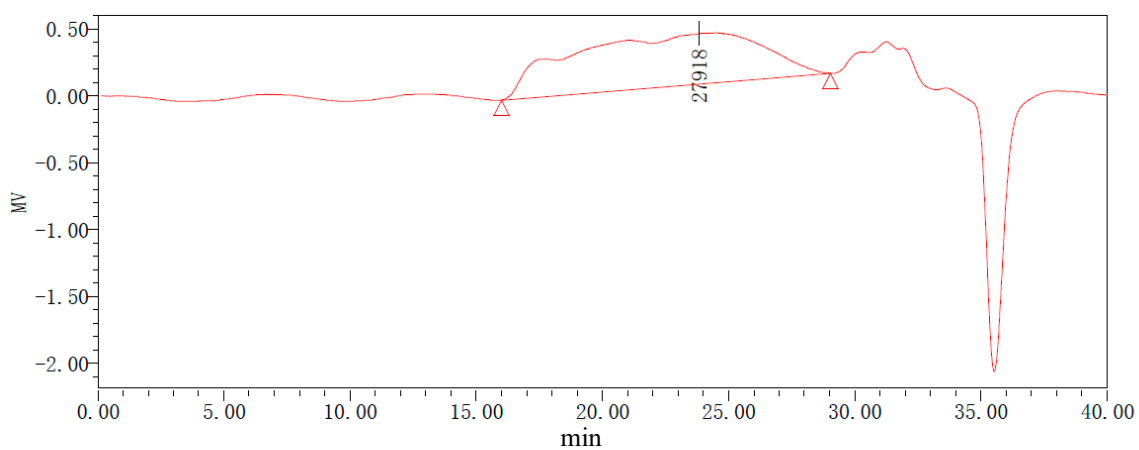

Table S3. GPC results.

| $M_n$ (D) | $M_w$ (D) | MP    | $M_z$ (D) | $M_z + 1$ (D) | PDI      |
|-----------|-----------|-------|-----------|---------------|----------|
| 28459     | 165261    | 27918 | 538068    | 861607        | 5.806930 |

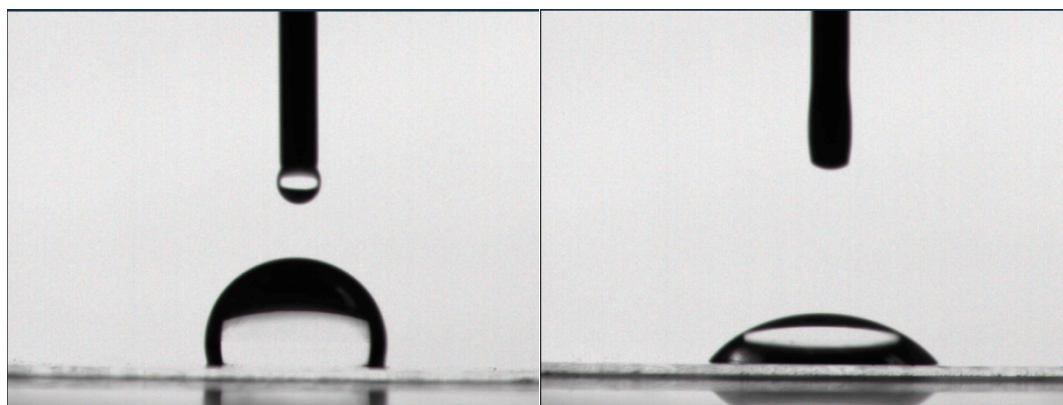

Figure S11. Contact Angle with Water and n-Hexadecane.

## 6. Compound of Poly (5-co-BMA) (1:8)

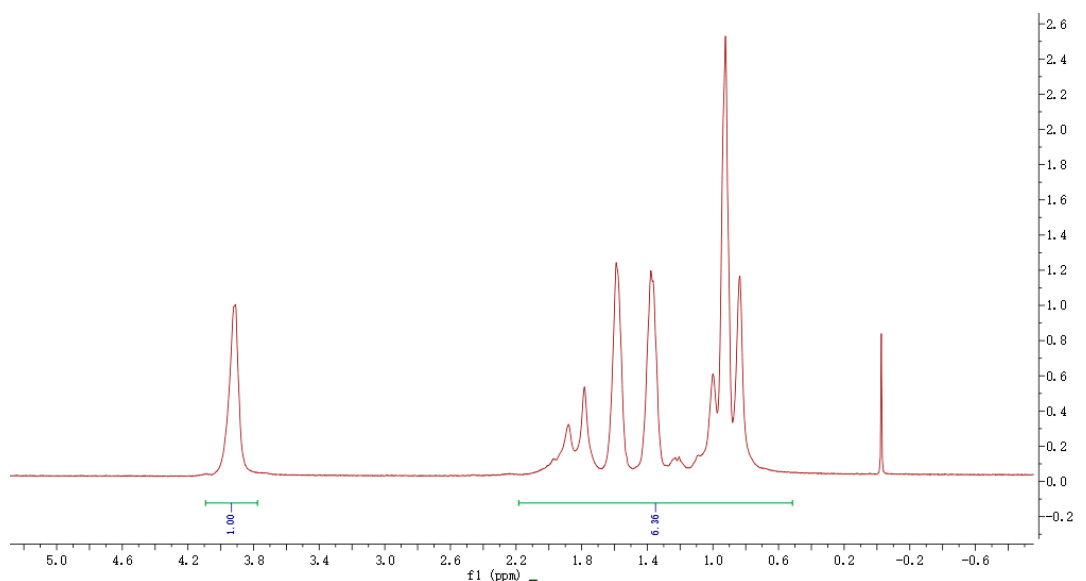

Figure S12.  $^1\text{H}$  NMR ( $\text{CDCl}_3$ , 400 MHz).

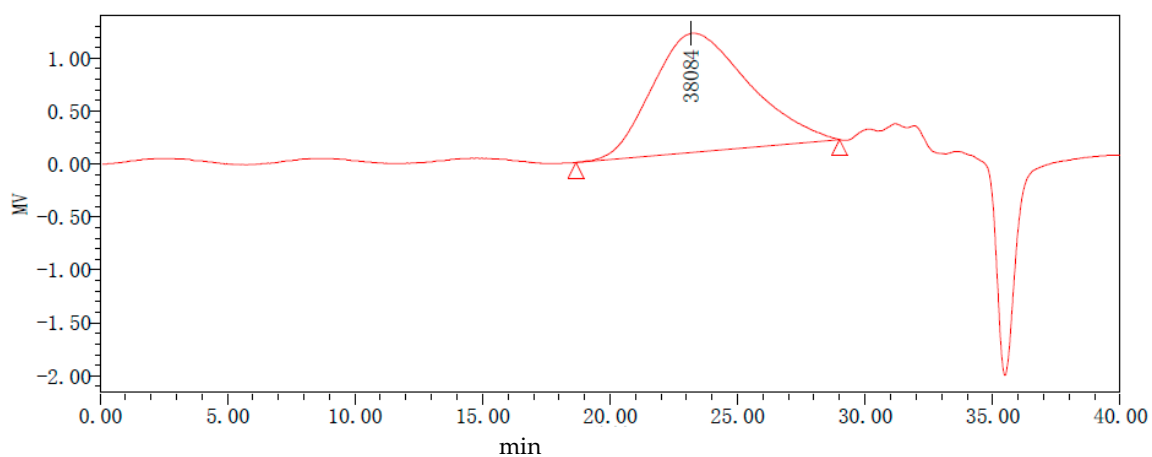

Table S4. GPC results.

| $M_n$ (D) | $M_w$ (D) | MP    | $M_z$ (D) | $M_z + 1$ (D) | PDI      |
|-----------|-----------|-------|-----------|---------------|----------|
| 21609     | 39510     | 38084 | 63225     | 88432         | 1.828393 |

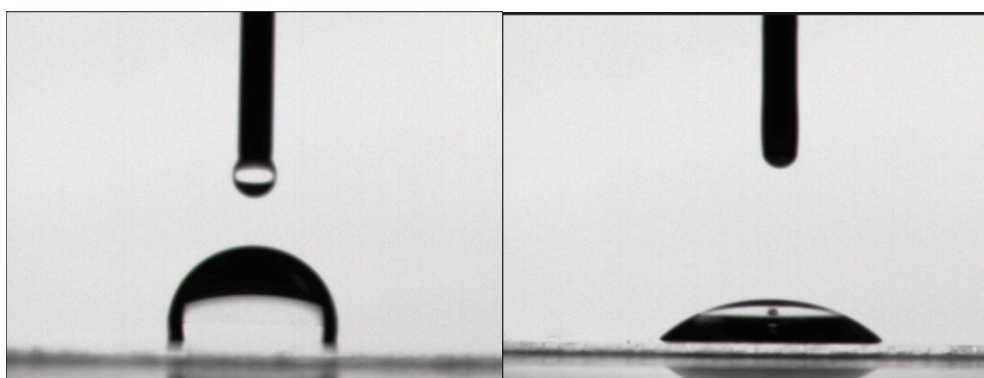

Figure S13. Contact Angle with Water and n-Hexadecane.

7. Compound of Poly (5-co-BMA) (1:15)

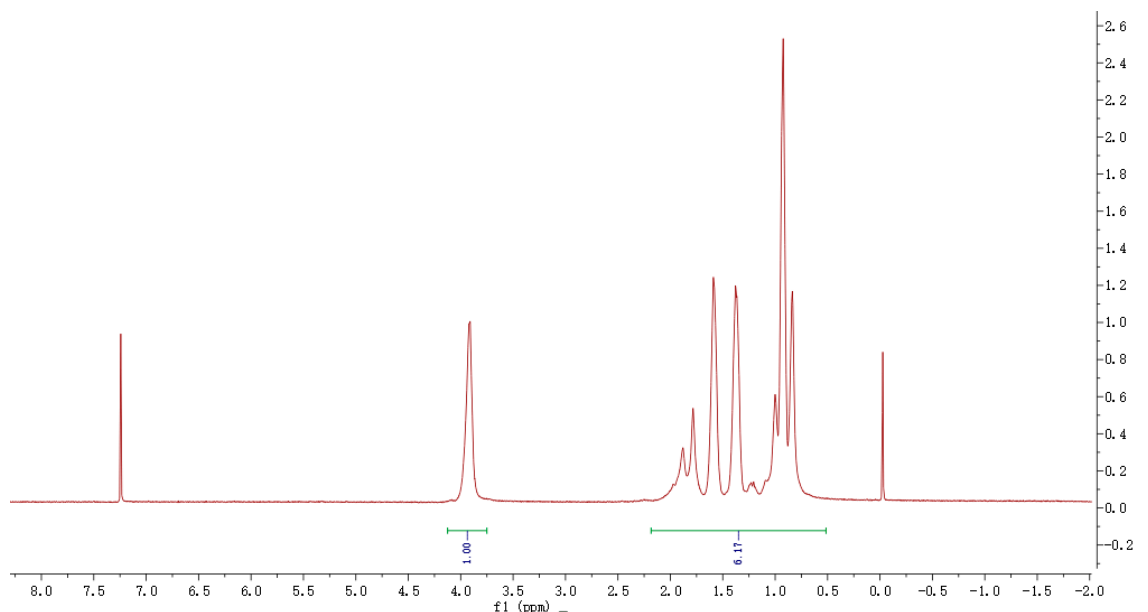

Figure S14.  $^1\text{H}$  NMR ( $\text{CDCl}_3$ , 400 MHz).

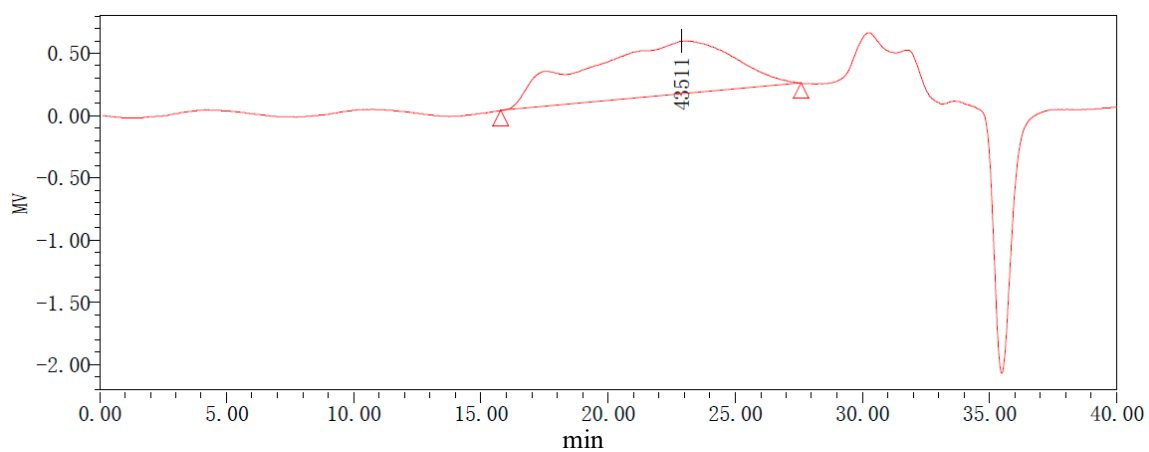

Table S5. GPC results.

| $M_n$ (D) | $M_w$ (D) | MP    | $M_z$ (D) | $M_z + 1$ (D) | PDI      |
|-----------|-----------|-------|-----------|---------------|----------|
| 44983     | 185349    | 43511 | 558085    | 897990        | 4.120455 |

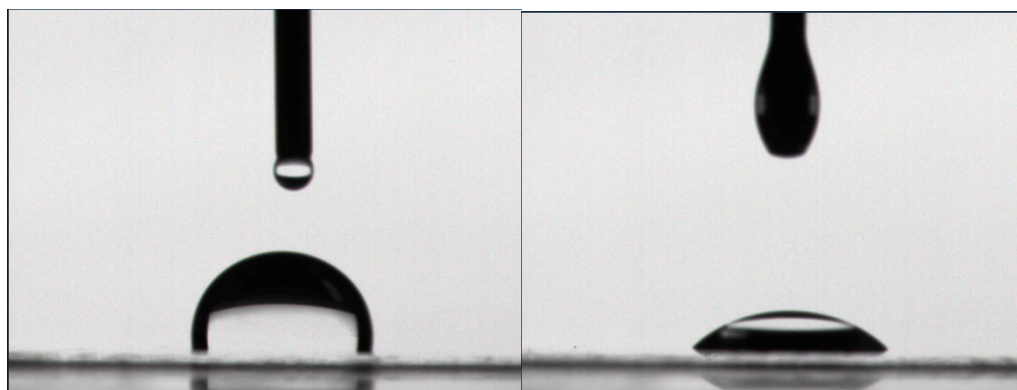

Figure S15. Contact Angle with Water and n-Hexadecane.

8. Compound of Poly (5-co-MMA) (1:1)

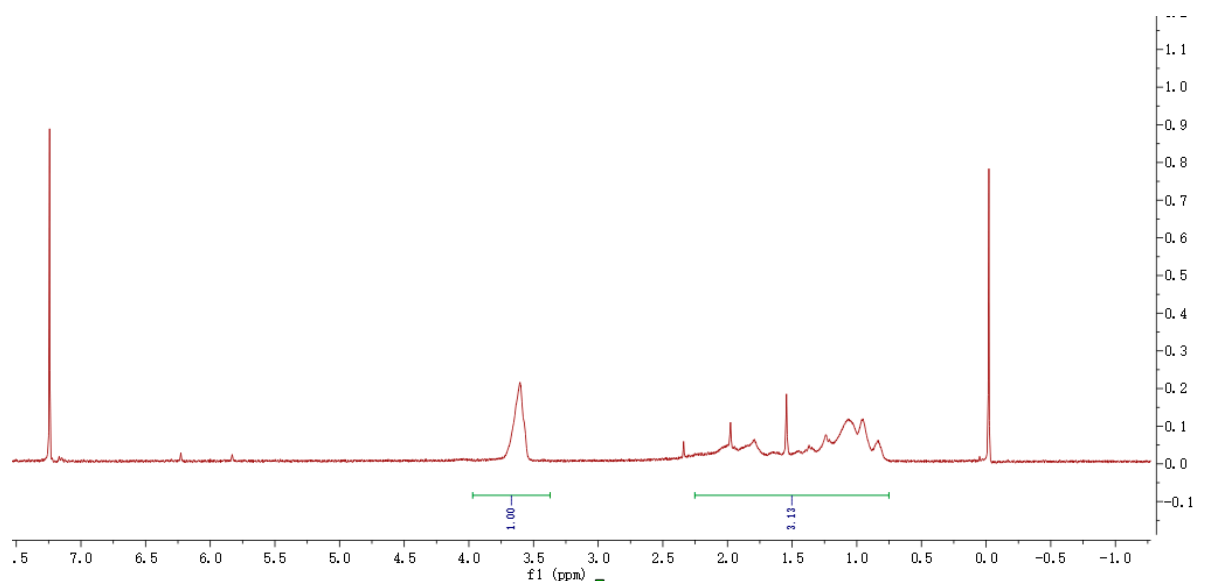

Figure S16. <sup>1</sup>H NMR (CDCl<sub>3</sub>, 400 MHz).

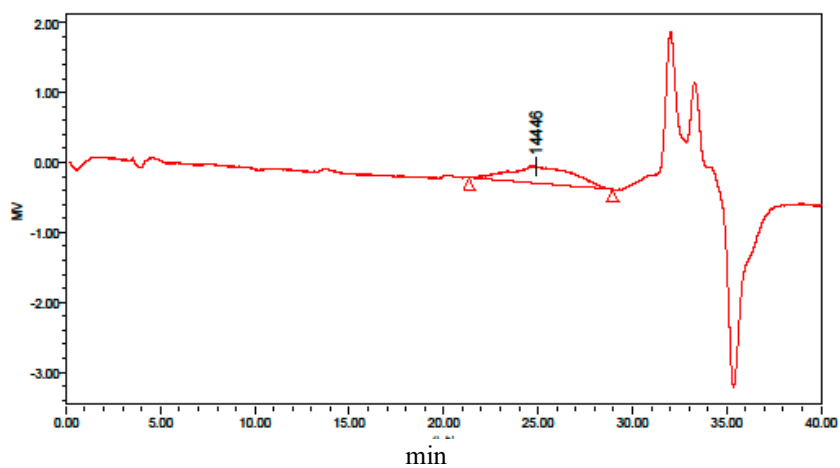

Table S6. GPC results.

| $M_n$ (D) | $M_w$ (D) | MP    | $M_z$ (D) | $M_z + 1$ (D) | PDI      |
|-----------|-----------|-------|-----------|---------------|----------|
| 10195     | 15762     | 14446 | 24792     | 35193         | 1.546086 |

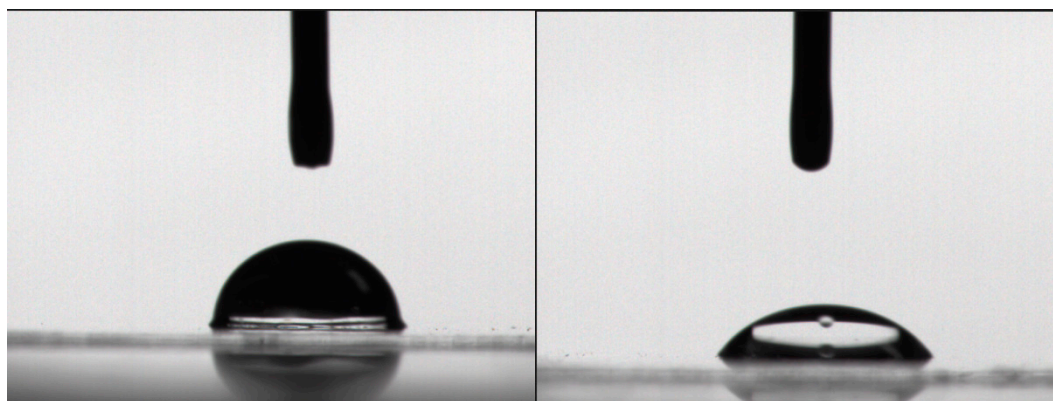

Figure S17. Contact Angle with Water and n-Hexadecane.



## 9. Compound of Poly (5-co-MMA) (1:2)

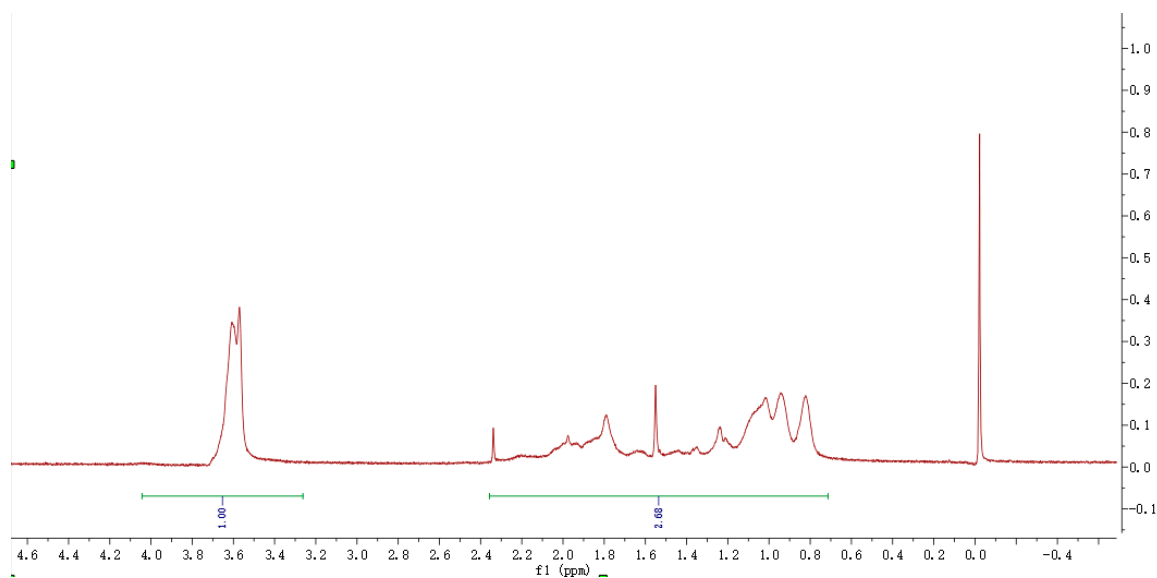

Figure S18. <sup>1</sup>H NMR (CDCl<sub>3</sub>, 400 MHz).

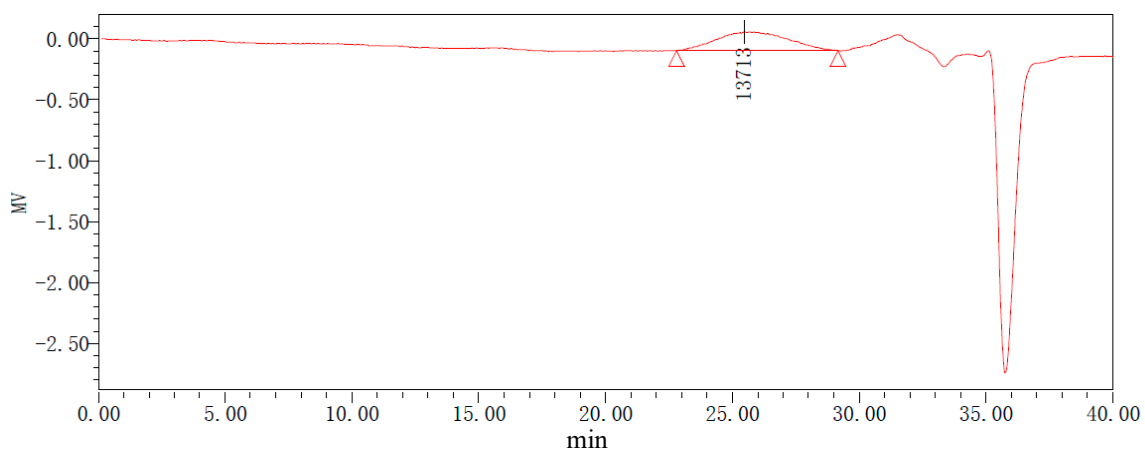

Table S7. GPC results.

| $M_n$ (D) | $M_w$ (D) | MP    | $M_z$ (D) | $M_z + 1$ (D) | PDI      |
|-----------|-----------|-------|-----------|---------------|----------|
| 10210     | 13359     | 13713 | 17094     | 20969         | 1.308438 |

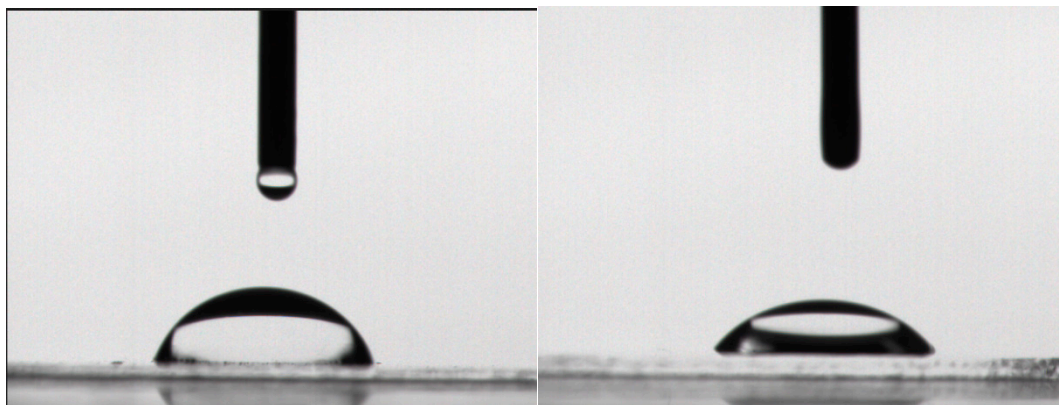

Figure S19. Contact Angle with Water and n-Hexadecane.

10. Compound of Poly(5-co-MMA) (1:6)

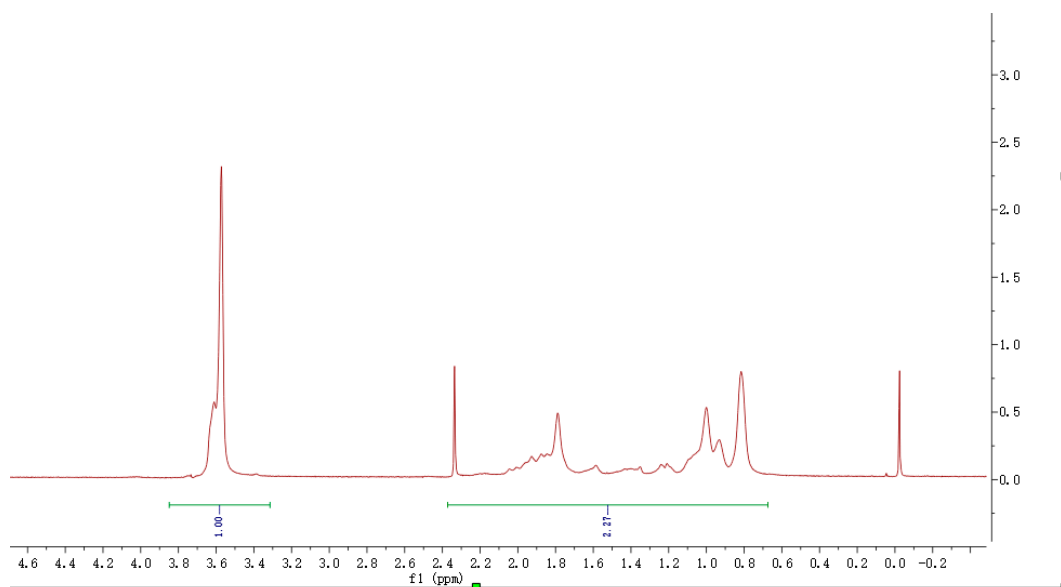

Figure S20. <sup>1</sup>H NMR (CDCl<sub>3</sub>, 400 MHz).

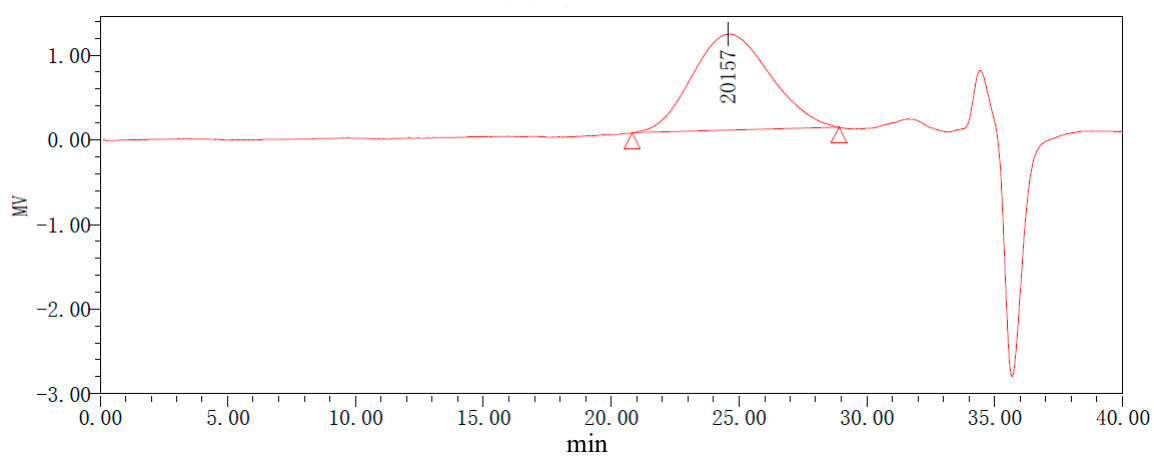

Table S8. GPC results.

| $M_n$ (D) | $M_w$ (D) | MP    | $M_z$ (D) | $M_z + 1$ (D) | PDI      |
|-----------|-----------|-------|-----------|---------------|----------|
| 15593     | 22327     | 20157 | 31089     | 40976         | 1.431868 |

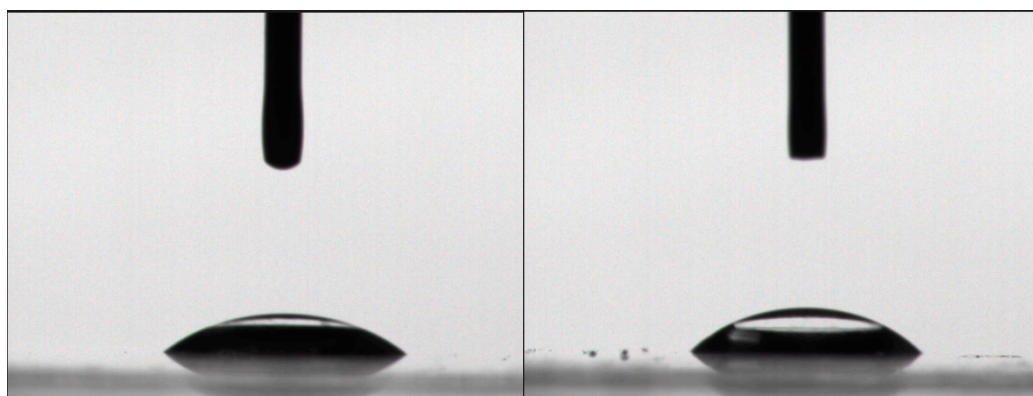

Figure S21. Contact Angle with Water and n-Hexadecane.

11. Compound of Poly(5-co-MMA) (1:8)

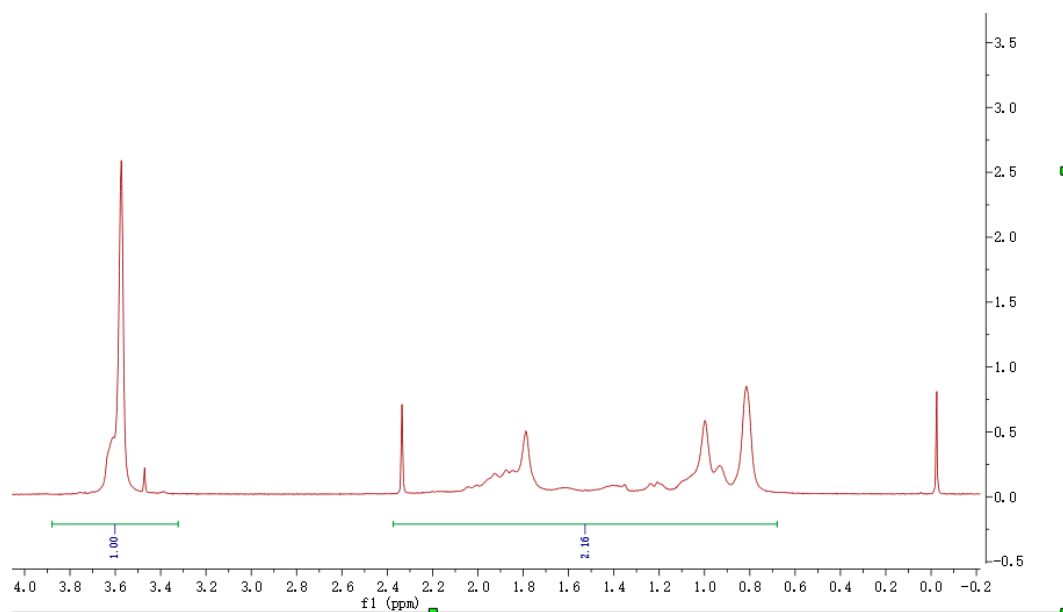

Figure S22. <sup>1</sup>H NMR (CDCl<sub>3</sub>, 400 MHz).

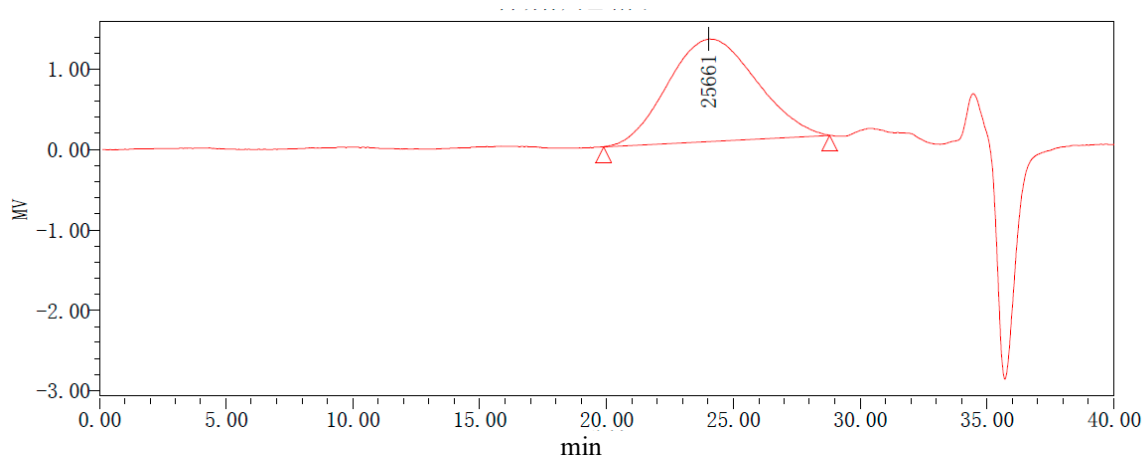

Table S9. GPC results.

| $M_n$ (D) | $M_w$ (D) | MP    | $M_z$ (D) | $M_z + 1$ (D) | PDI      |
|-----------|-----------|-------|-----------|---------------|----------|
| 18710     | 29939     | 25661 | 45514     | 62849         | 1.600163 |

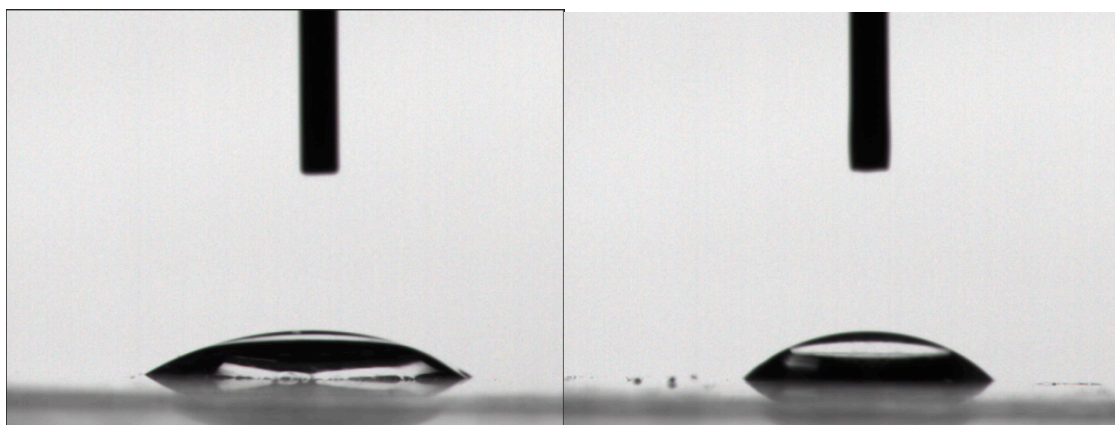

Figure S23. Contact Angle with Water and n-Hexadecane.

## 12. Compound of Poly(5-co-MMA) (1:15)

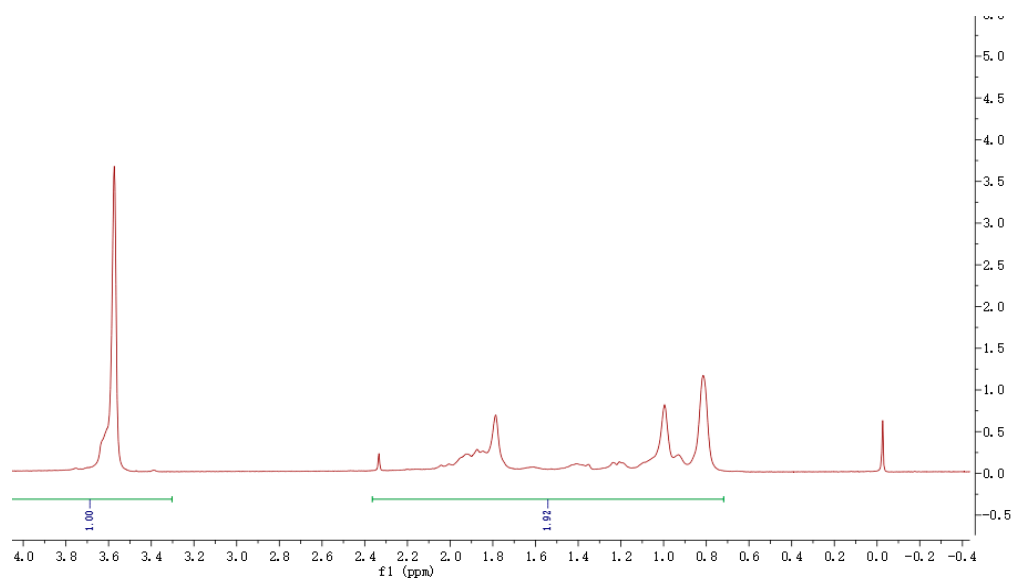

Figure S24.  $^1\text{H}$  NMR ( $\text{CDCl}_3$ , 400 MHz).

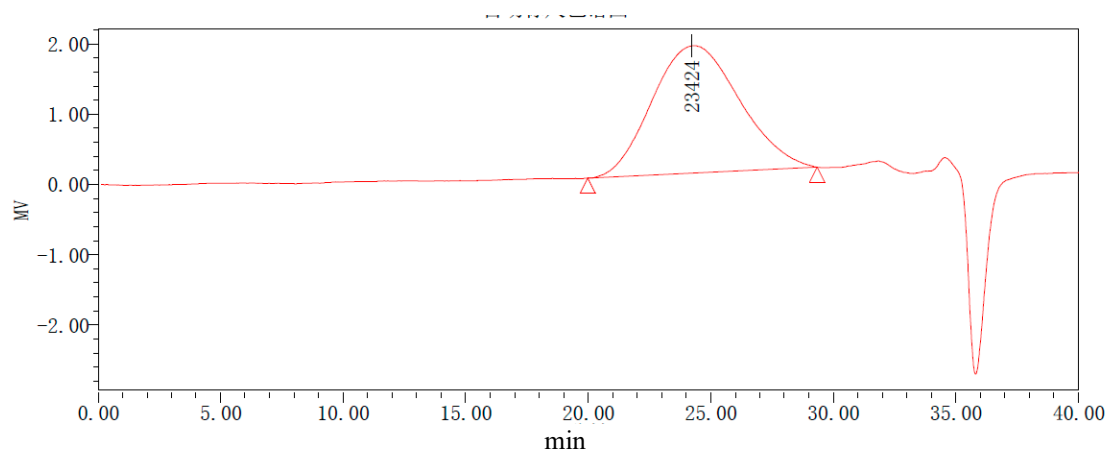

Table S10. GPC results.

| $M_n$ (D) | $M_w$ (D) | MP    | $M_z$ (D) | $M_z + 1$ (D) | PDI      |
|-----------|-----------|-------|-----------|---------------|----------|
| 16657     | 27020     | 23424 | 41165     | 56811         | 1.622089 |

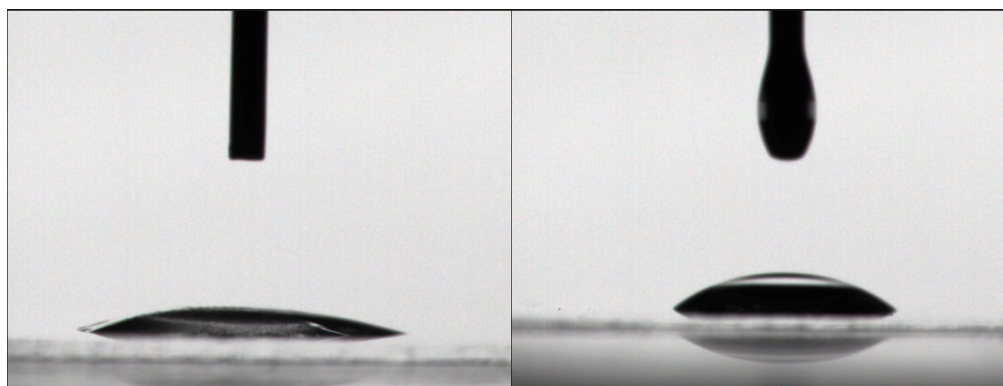

Figure S25. Contact Angle with Water and n-Hexadecane.

13. Compound of Poly(5-co-EMA) (1:15)

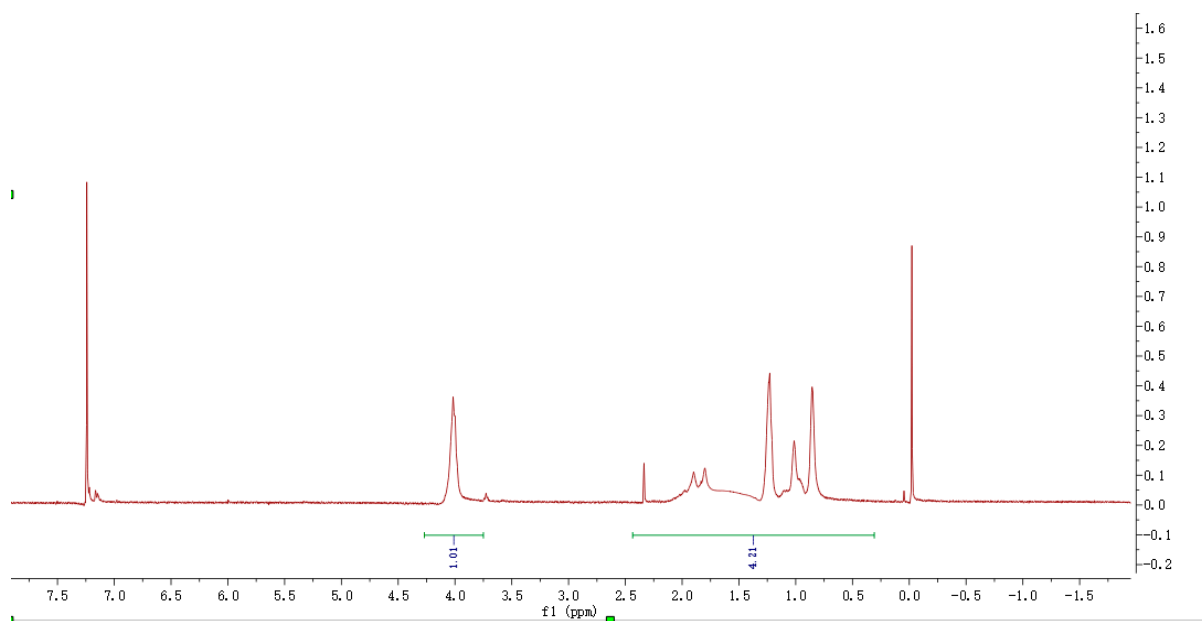

Figure S26. <sup>1</sup>H NMR (CDCl<sub>3</sub>, 400 MHz).

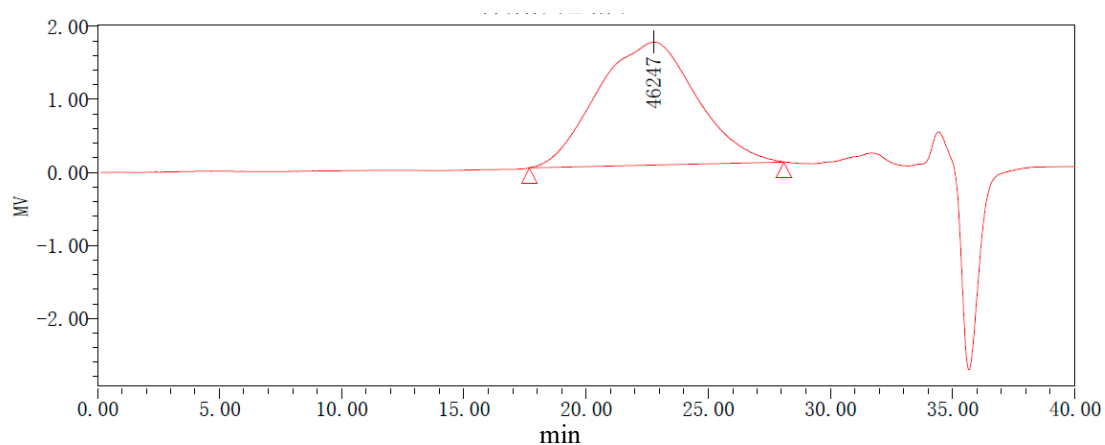

Table S11. GPC results.

| $M_n$ (D) | $M_w$ (D) | MP    | $M_z$ (D) | $M_z + 1$ (D) | PDI      |
|-----------|-----------|-------|-----------|---------------|----------|
| 36968     | 72112     | 46247 | 125805    | 186522        | 1.950671 |

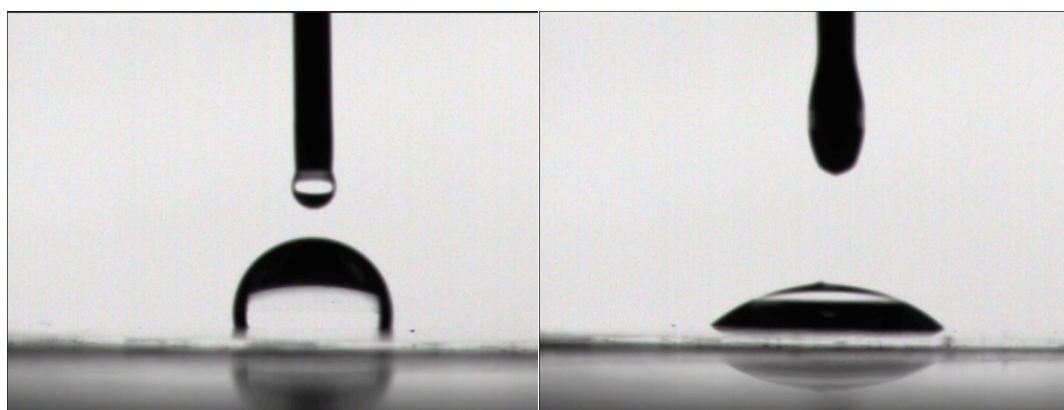

Figure S27. Contact Angle with Water and n-Hexadecane.

#### 14. Compound of Poly(5-co-EMA) (1:8)

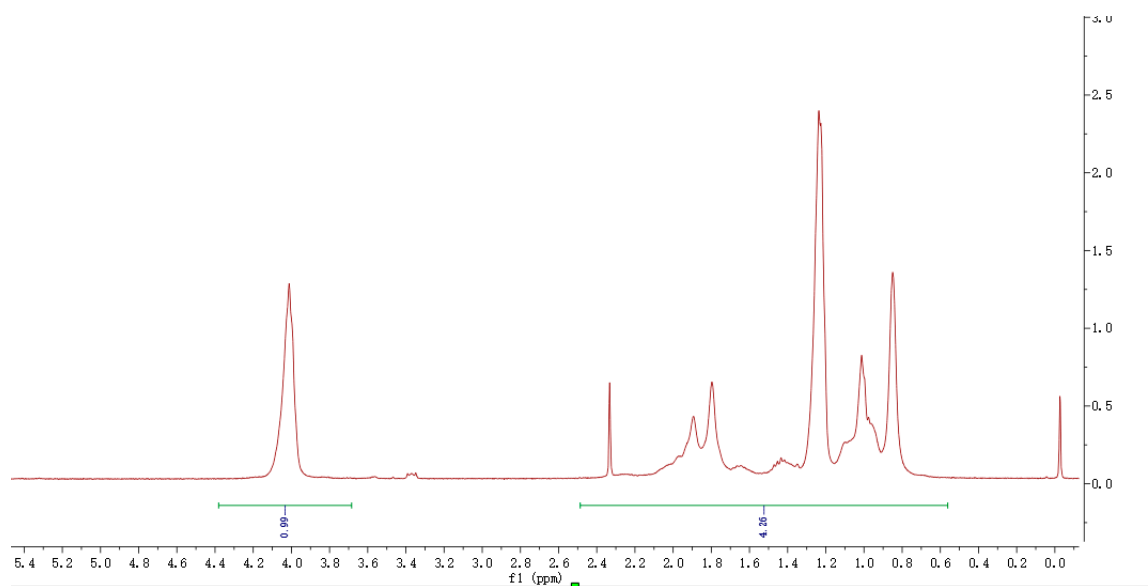

Figure S28.  $^1\text{H}$  NMR ( $\text{CDCl}_3$ , 400 MHz).

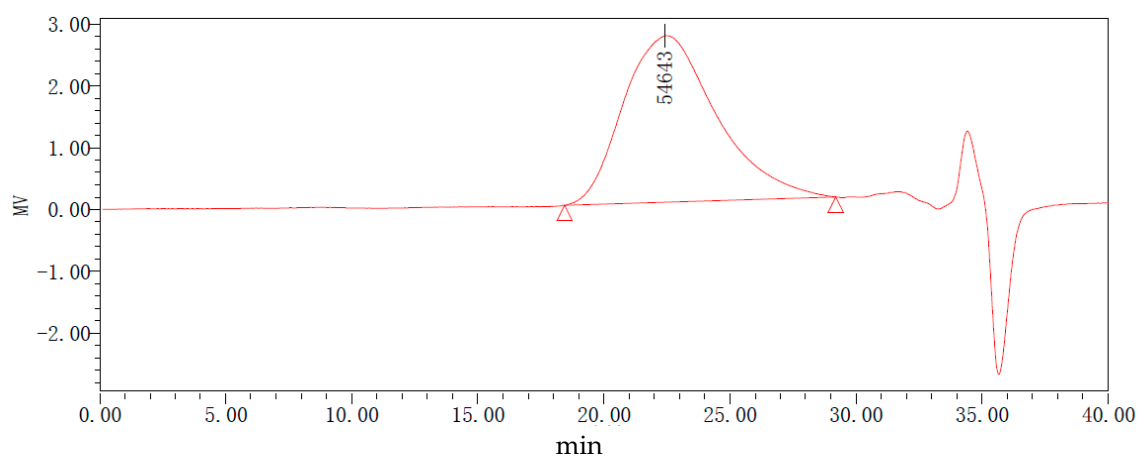

Table S12. GPC results.

| $M_n$ (D) | $M_w$ (D) | MP    | $M_z$ (D) | $M_z + 1$ (D) | PDI      |
|-----------|-----------|-------|-----------|---------------|----------|
| 31278     | 59834     | 54643 | 93593     | 126984        | 1.913009 |

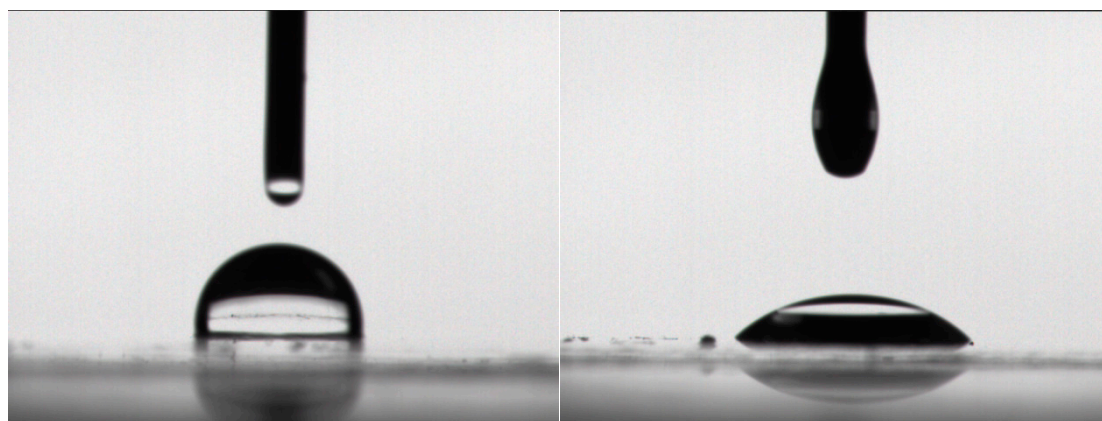

Figure S29. Contact Angle with Water and n-Hexadecane.

15. Compound of Poly(5-co-EMA) (1:6)

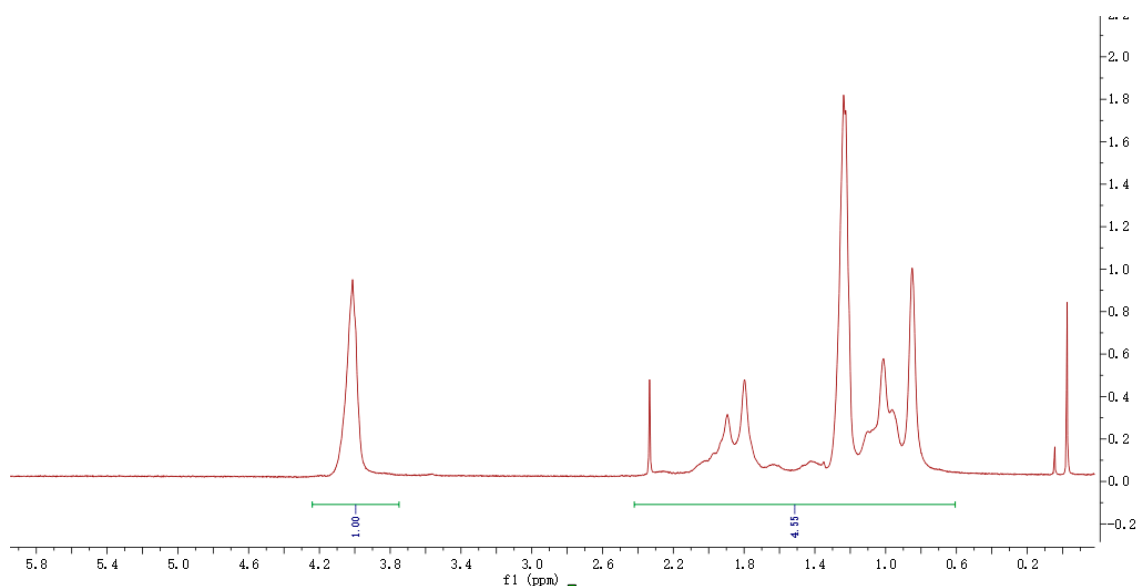

Figure S30. <sup>1</sup>H NMR (CDCl<sub>3</sub>, 400 MHz).

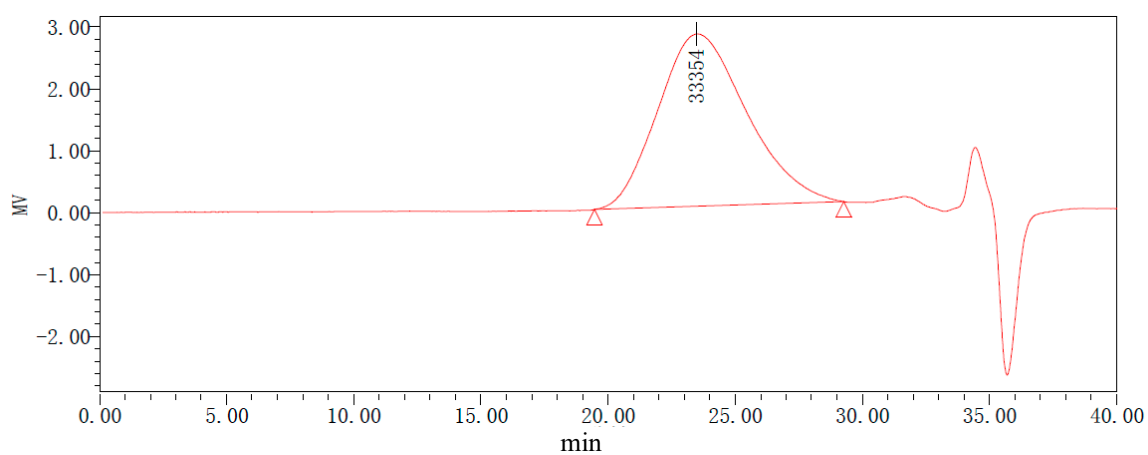

Table S13. GPC results.

| $M_n$ (D) | $M_w$ (D) | MP    | $M_z$ (D) | $M_z + 1$ (D) | PDI      |
|-----------|-----------|-------|-----------|---------------|----------|
| 21391     | 36209     | 33354 | 55343     | 75681         | 1.692668 |

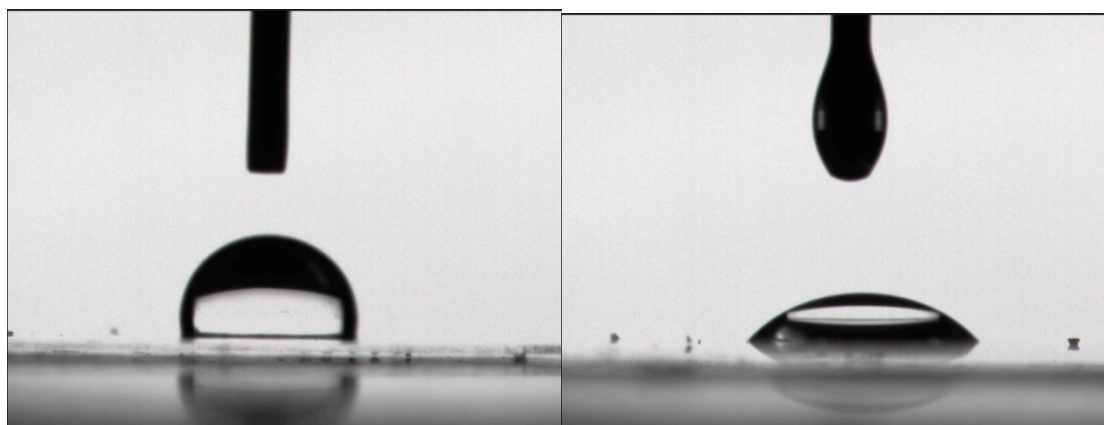

Figure S31. Contact Angle with Water and n-Hexadecane.

16. Compound of Poly(5-co-EMA) (1:2)

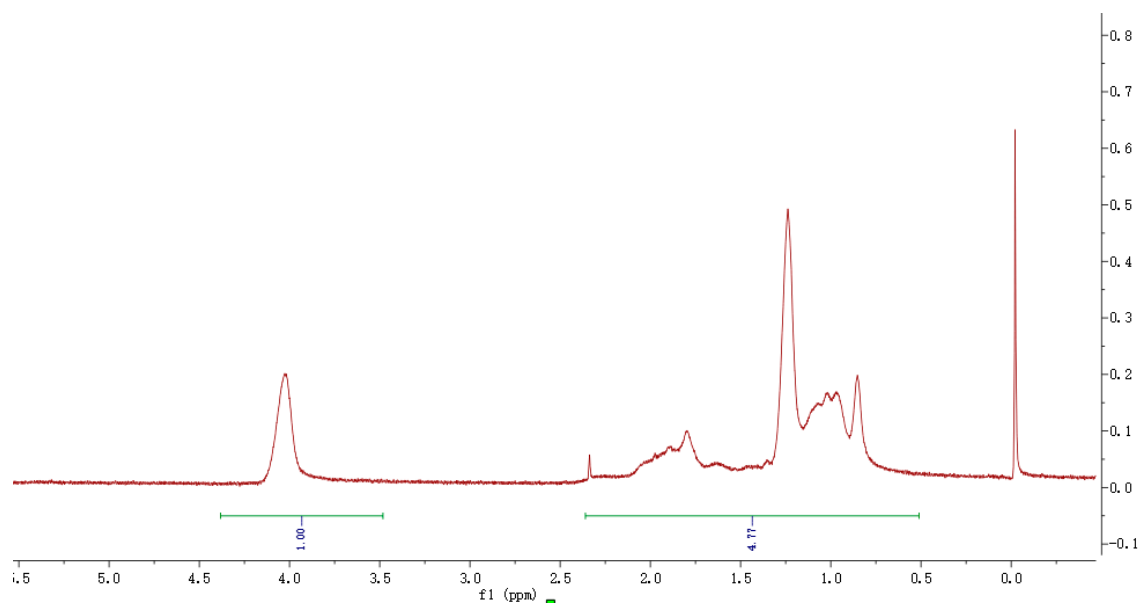

Figure S32. <sup>1</sup>H NMR (CDCl<sub>3</sub>, 400 MHz).

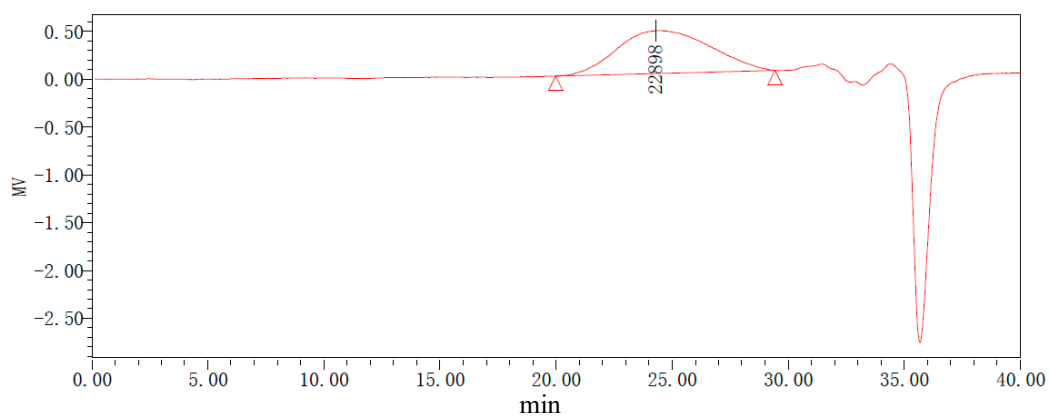

Table S14. GPC results.

| $M_n$ (D) | $M_w$ (D) | MP    | $M_z$ (D) | $M_z + 1$ (D) | PDI      |
|-----------|-----------|-------|-----------|---------------|----------|
| 14538     | 25291     | 22898 | 41182     | 59177         | 1.739608 |

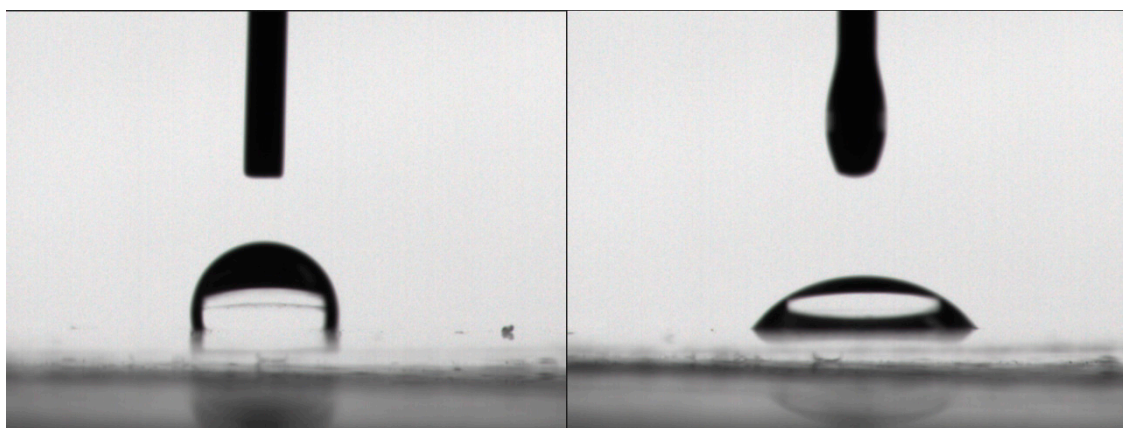

Figure S33. Contact Angle with Water and n-Hexadecane.



17. Compound of Poly(5-co-EMA) (1:1)

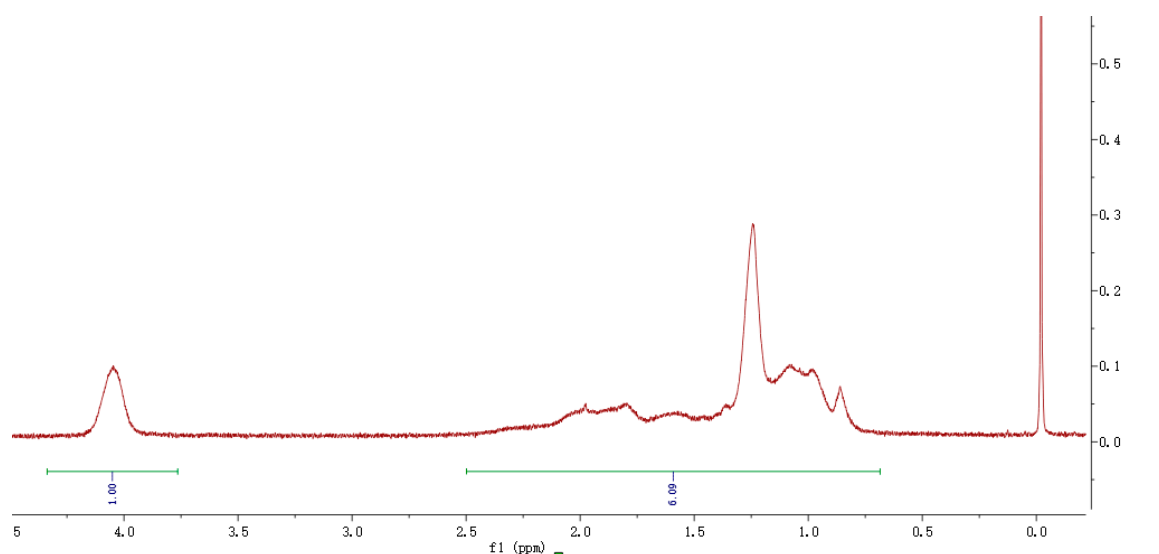

Figure S34.  $^1\text{H}$  NMR ( $\text{CDCl}_3$ , 400 MHz).

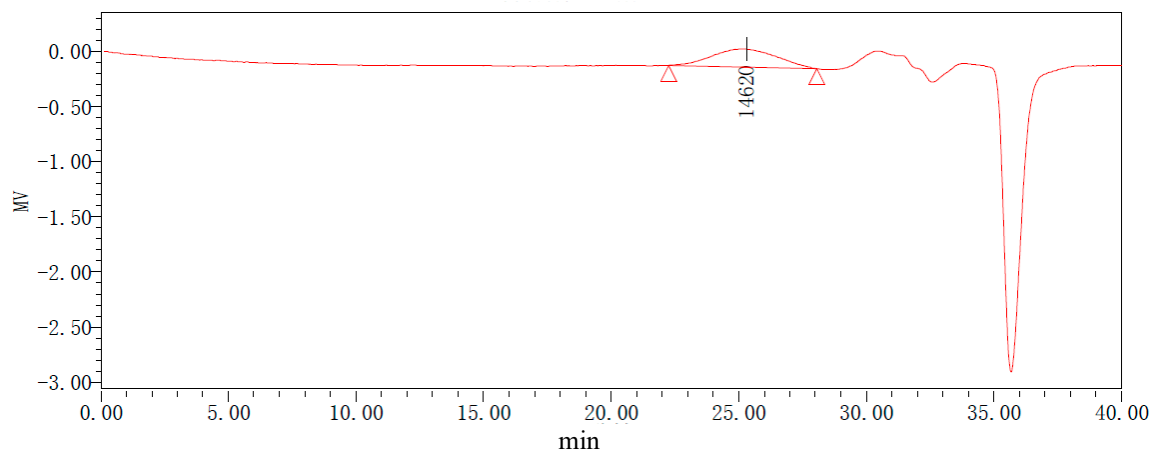

Table S15. GPC results.

| $M_n$ (D) | $M_w$ (D) | MP    | $M_z$ (D) | $M_z + 1$ (D) | PDI      |
|-----------|-----------|-------|-----------|---------------|----------|
| 13584     | 16966     | 14620 | 21232     | 26051         | 1.248996 |

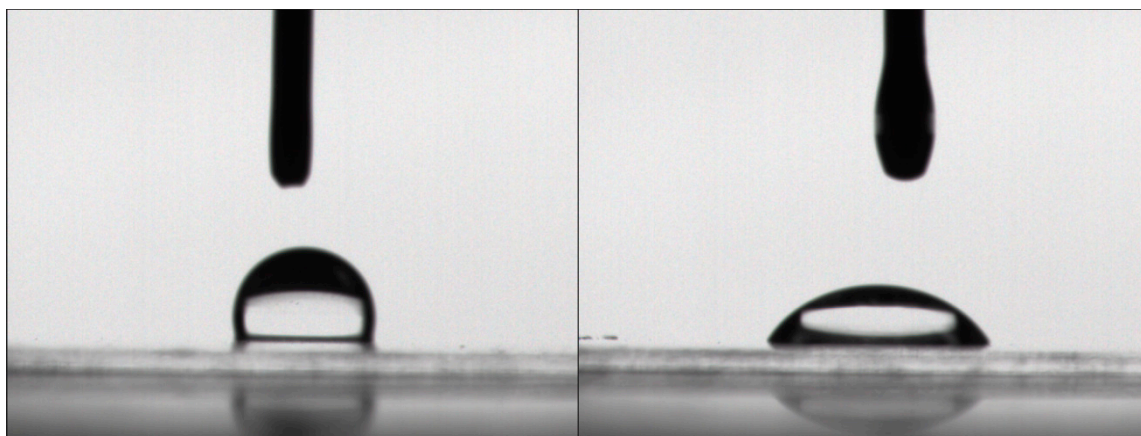

Figure S35. Contact Angle with Water and n-Hexadecane.

18. Compound of Poly(5-co-HMA) (1:15)

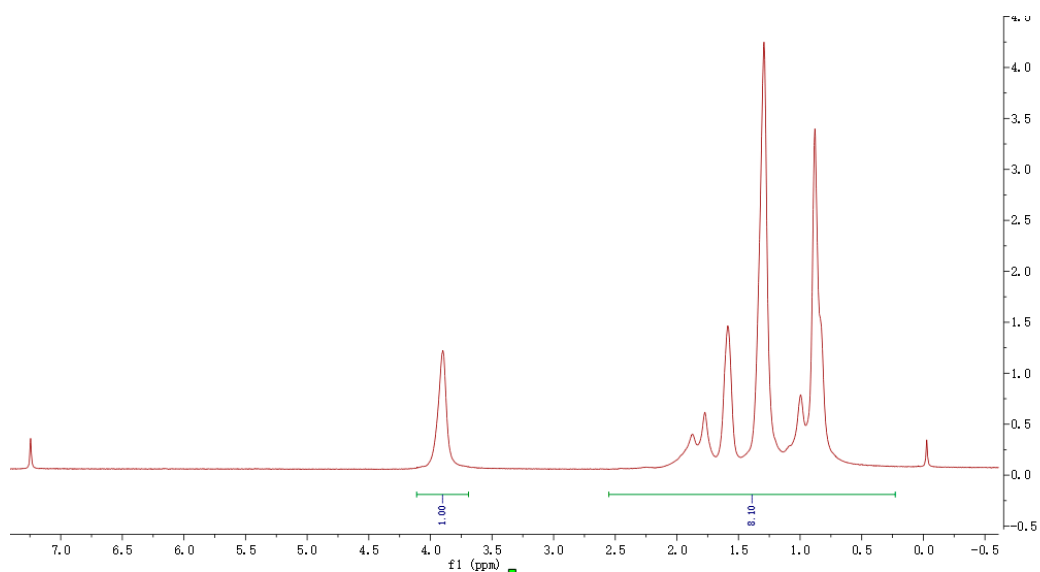

Figure S36.  $^1\text{H}$  NMR ( $\text{CDCl}_3$ , 400 MHz).

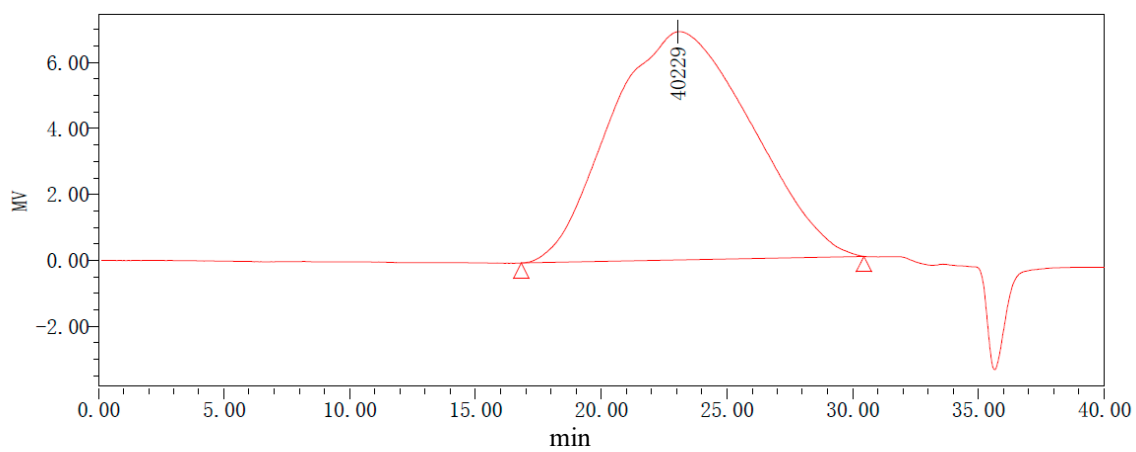

Table S16. GPC results.

| $M_n$ (D) | $M_w$ (D) | MP    | $M_z$ (D) | $M_z + 1$ (D) | PDI      |
|-----------|-----------|-------|-----------|---------------|----------|
| 20518     | 64145     | 40229 | 152163    | 260728        | 3.126285 |

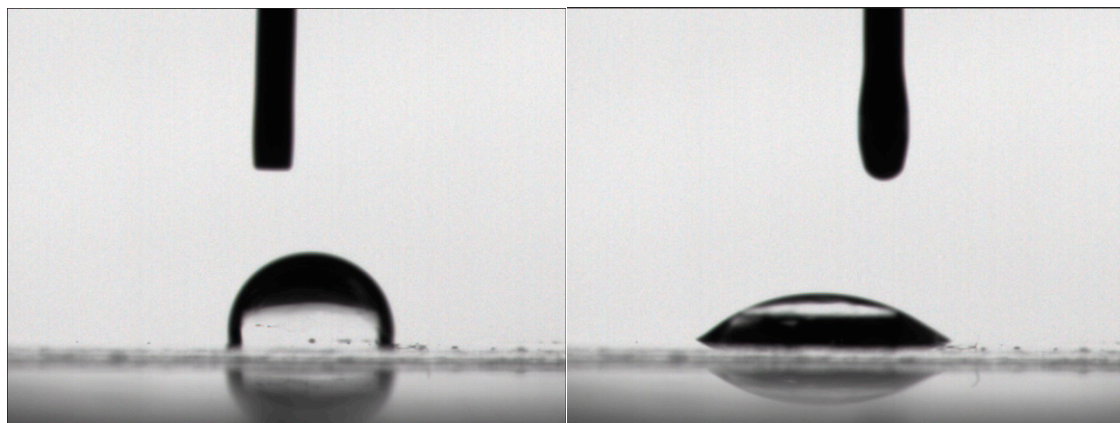

Figure S37. Contact Angle with Water and n-Hexadecane.

19. Compound of Poly(5-co-HMA) (1:8)

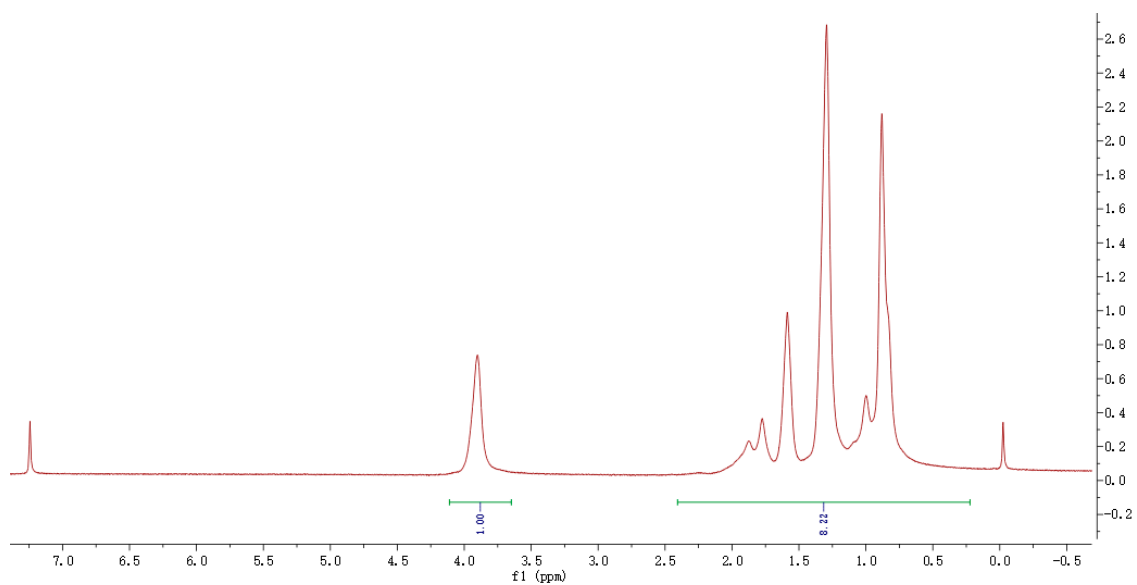

Figure S38. <sup>1</sup>H NMR (CDCl<sub>3</sub>, 400 MHz).

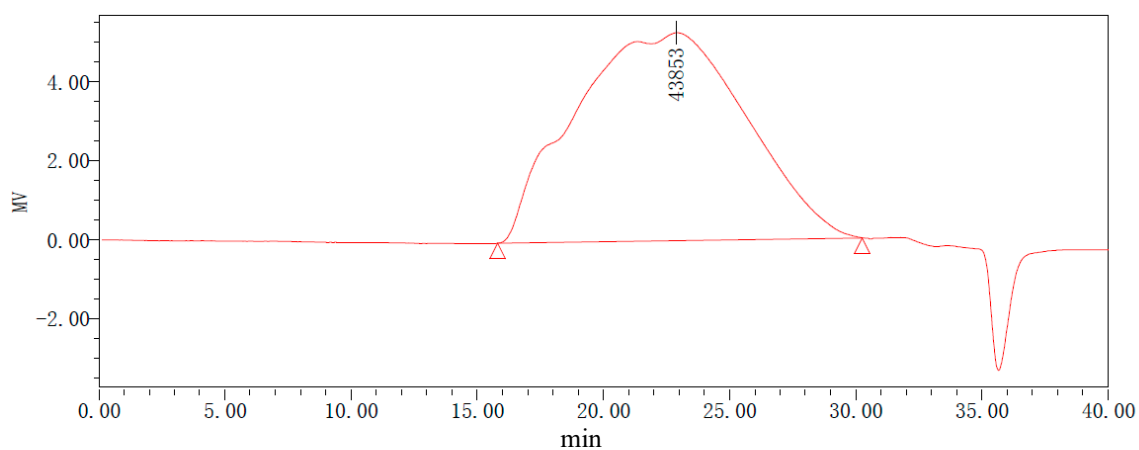

Table S17. GPC results.

| $M_n$ (D) | $M_w$ (D) | MP    | $M_z$ (D) | $M_z + 1$ (D) | PDI      |
|-----------|-----------|-------|-----------|---------------|----------|
| 27071     | 138428    | 43853 | 468579    | 848319        | 5.113542 |

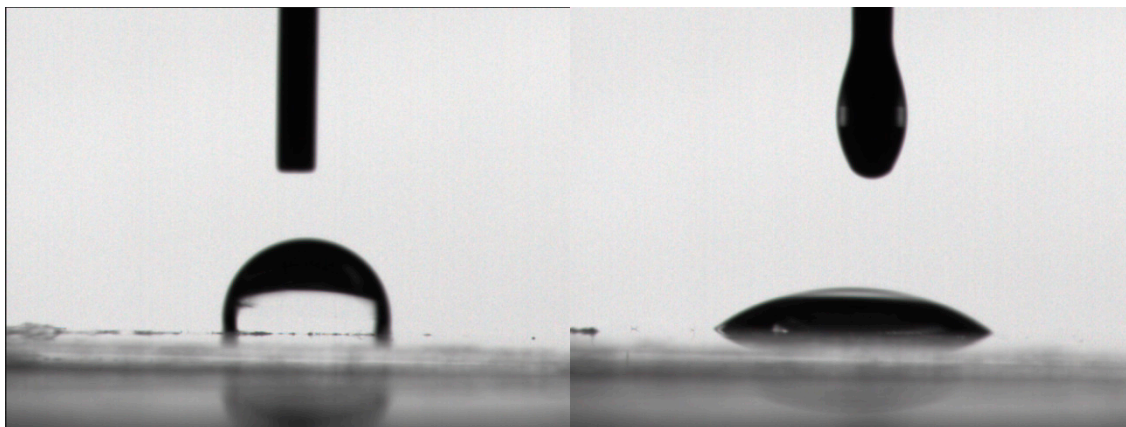

Figure S39. Contact Angle with Water and n-Hexadecane.

20. Compound of Poly(5-co-HMA) (1:6)

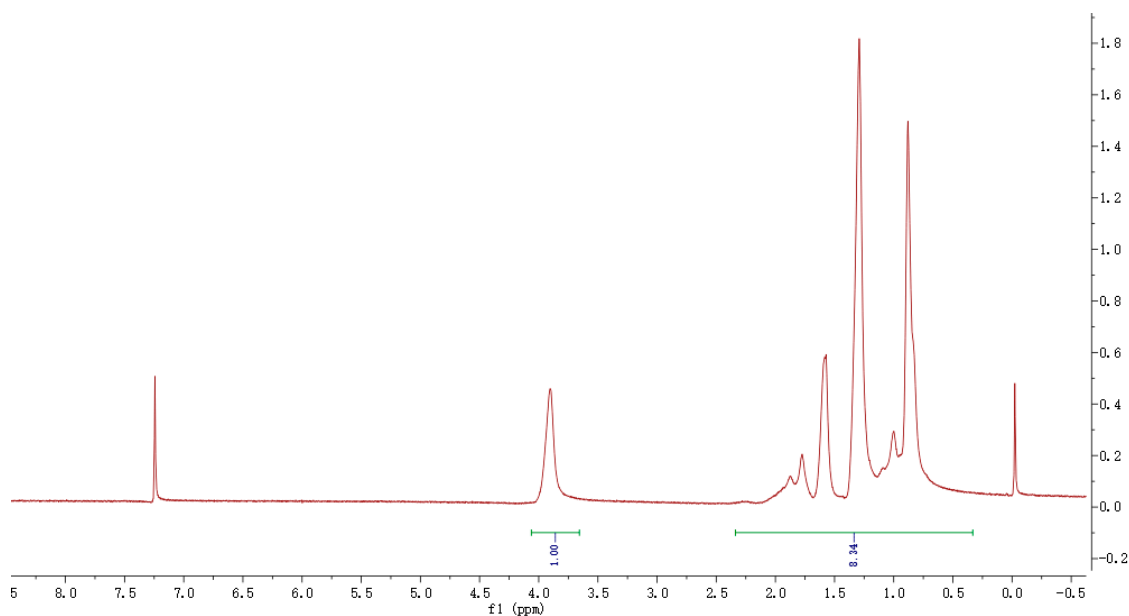

Figure S40.  $^1\text{H}$  NMR ( $\text{CDCl}_3$ , 400 MHz).

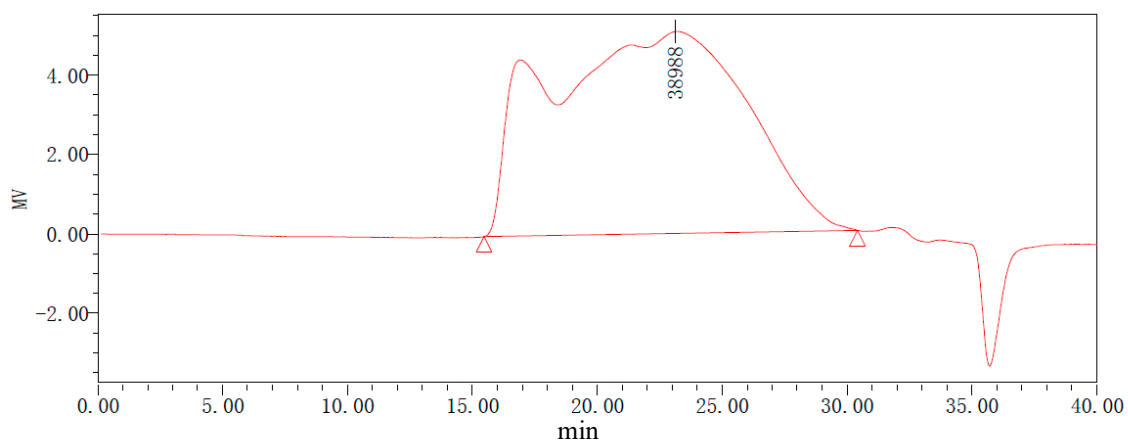

Table S18. GPC results.

| $M_n$ (D) | $M_w$ (D) | MP    | $M_z$ (D) | $M_z + 1$ (D) | PDI      |
|-----------|-----------|-------|-----------|---------------|----------|
| 27239     | 240433    | 38988 | 938870    | 1493989       | 8.826767 |

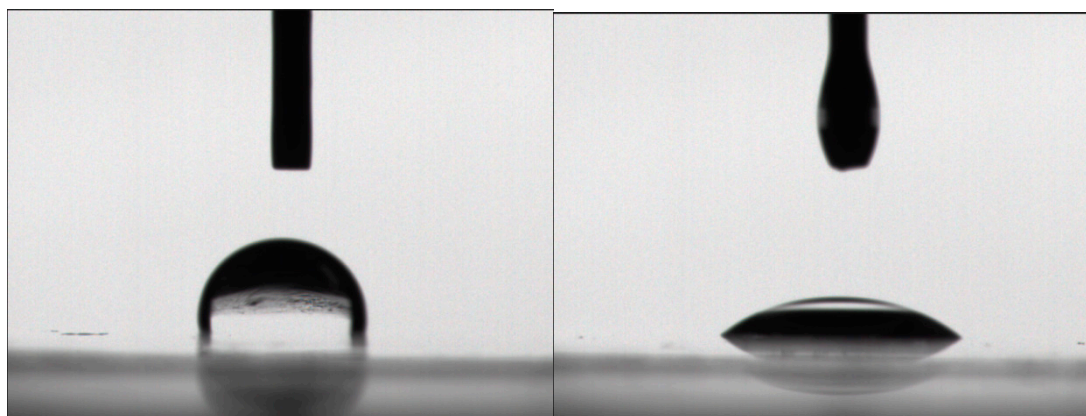

Figure S41 Contact Angle with Water and n-Hexadecane.

21. Compound of Poly(5-co-HMA) (1:2)

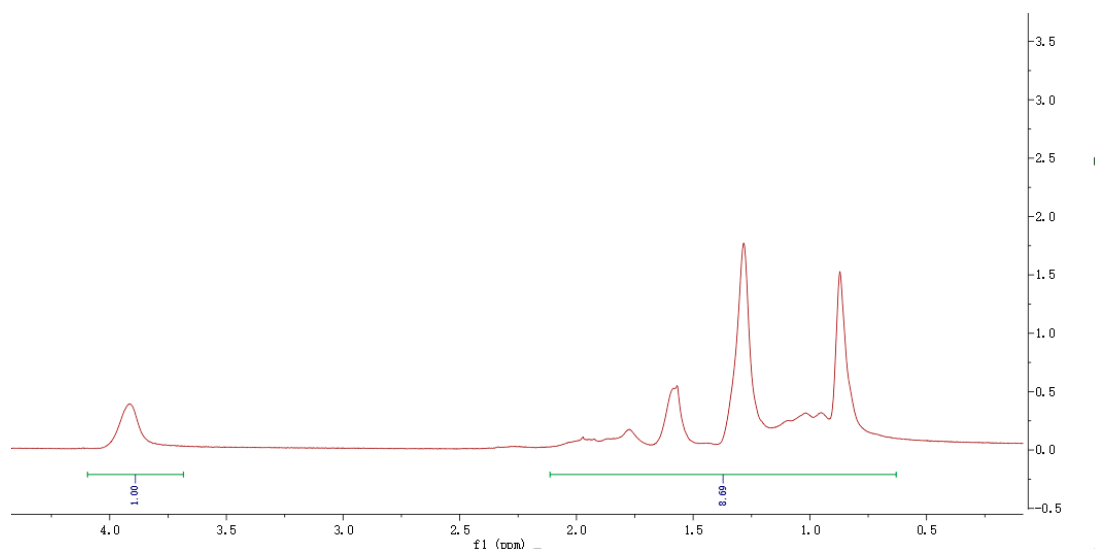

Figure S42. <sup>1</sup>H NMR (CDCl<sub>3</sub>, 400 MHz).

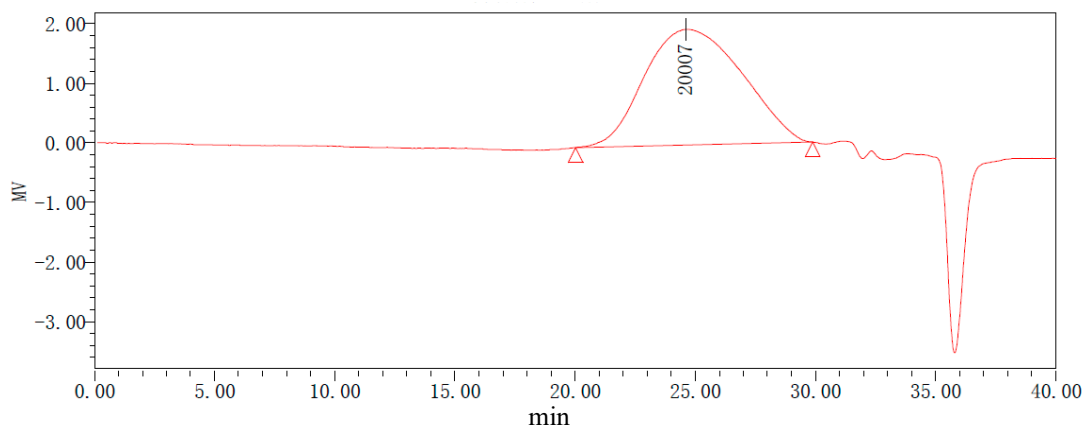

Table S19. GPC results.

| $M_n$ (D) | $M_w$ (D) | MP    | $M_z$ (D) | $M_z + 1$ (D) | PDI      |
|-----------|-----------|-------|-----------|---------------|----------|
| 12680     | 22058     | 20007 | 35839     | 51788         | 1.739677 |

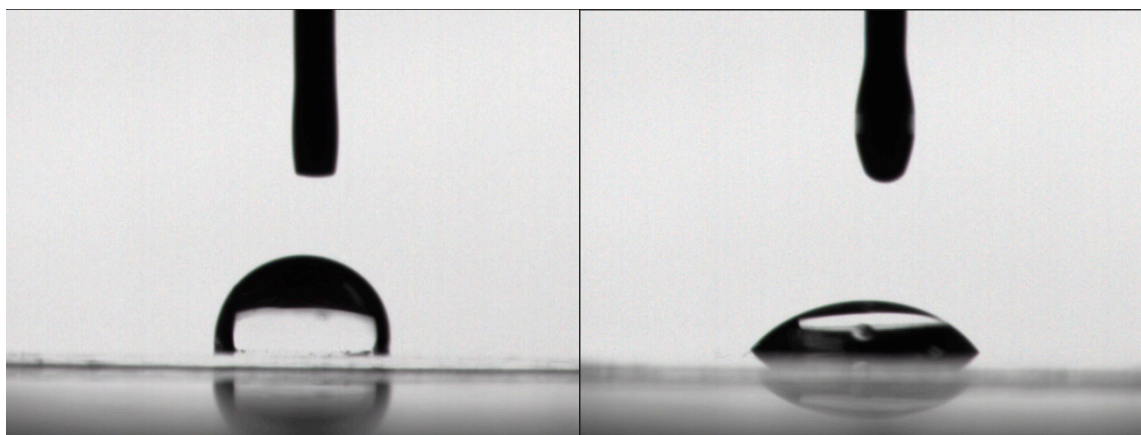

Figure S43. Contact Angle with Water and n-Hexadecane.

22. Compound of Poly(5-co-HMA) (1:1)

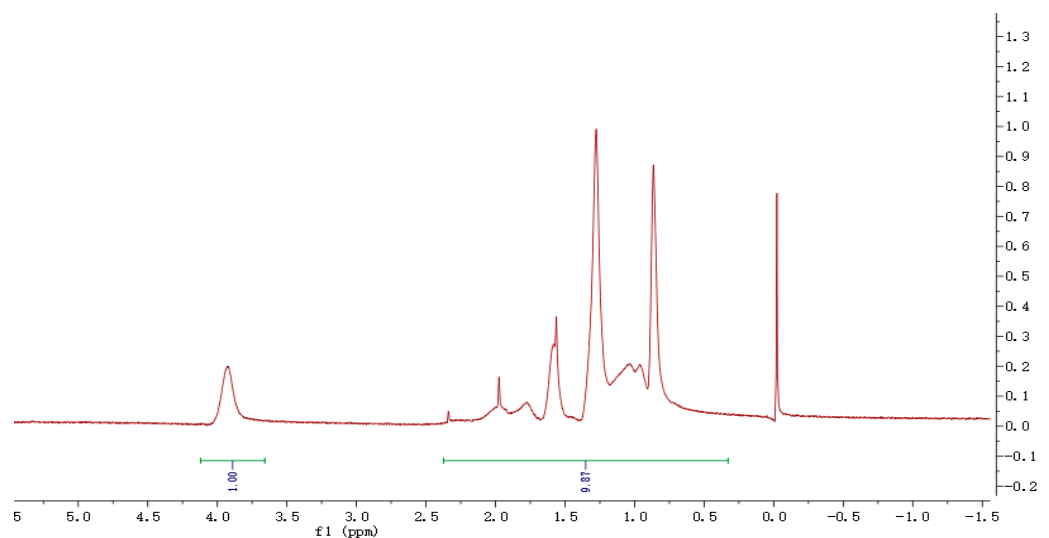

Figure S44.  $^1\text{H}$  NMR ( $\text{CDCl}_3$ , 400 MHz).

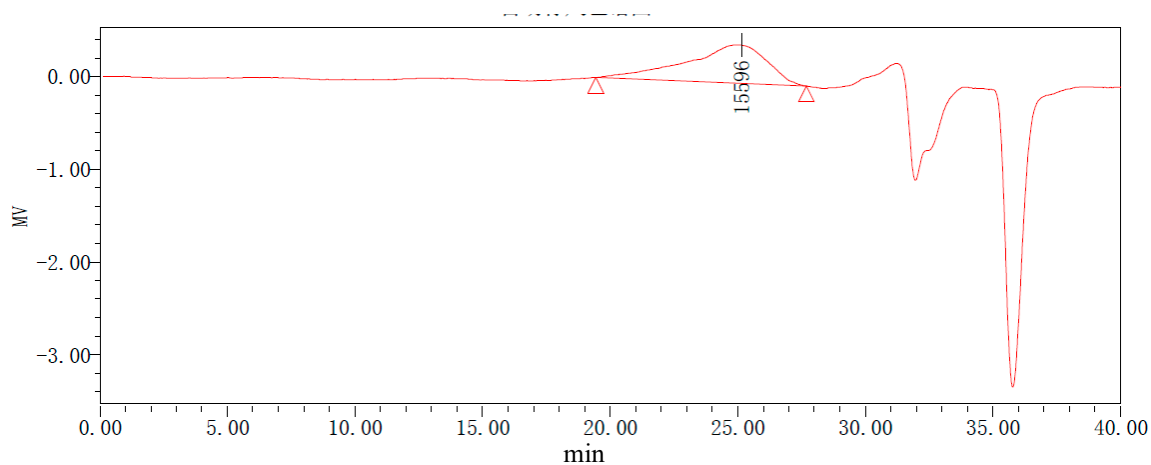

Table S20. GPC results.

| $M_n$ (D) | $M_w$ (D) | MP    | $M_z$ (D) | $M_z + 1$ (D) | PDI      |
|-----------|-----------|-------|-----------|---------------|----------|
| 19019     | 31622     | 15596 | 58417     | 92315         | 1.662623 |

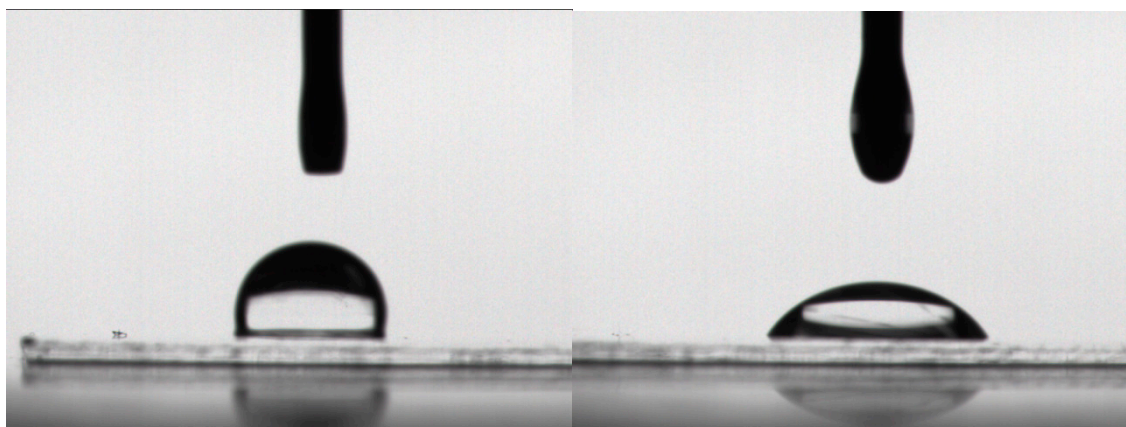

Figure S45. Contact Angle with Water and n-Hexadecane.

23. Compound of Poly(5-co-OMA) (1:15)

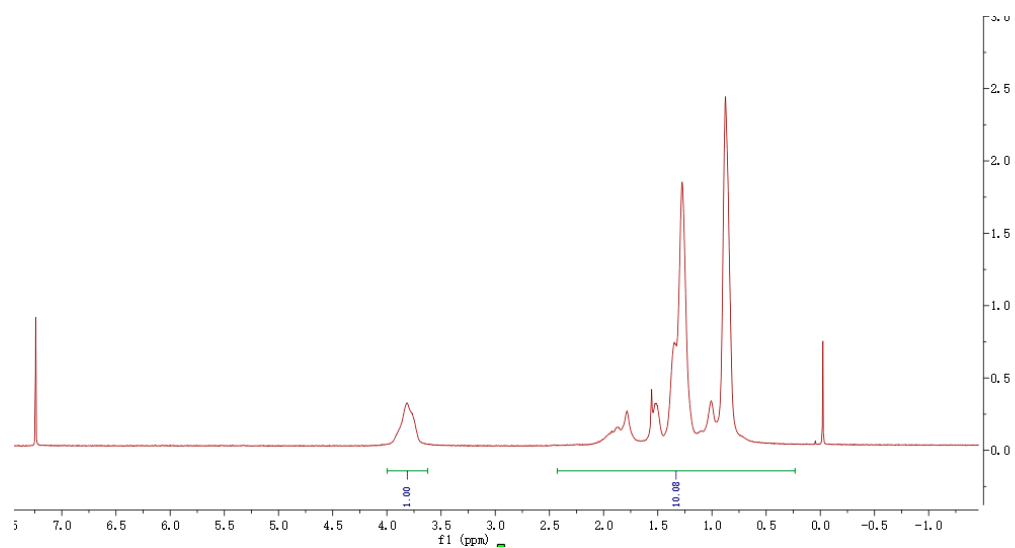

Figure S46. <sup>1</sup>H NMR (CDCl<sub>3</sub>, 400 MHz).

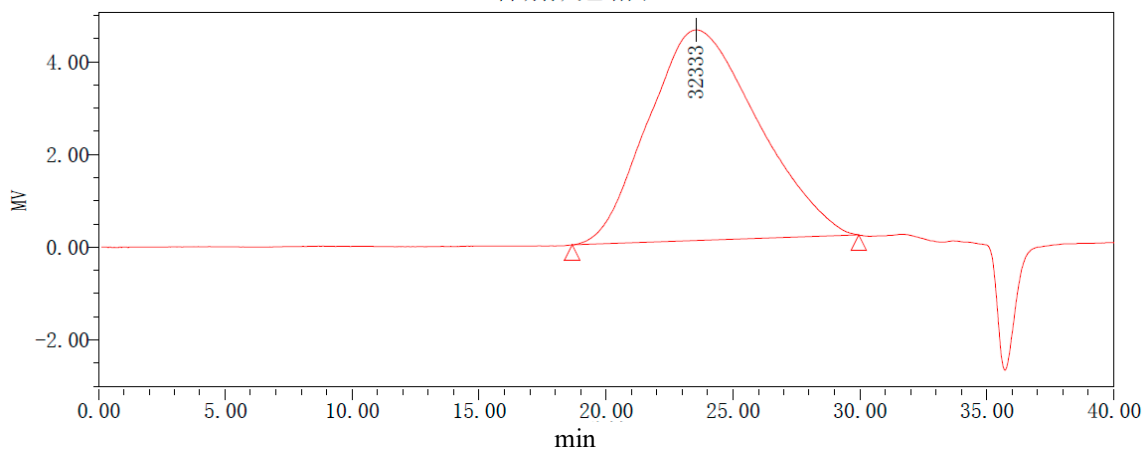

Table S21. GPC results.

| $M_n$ (D) | $M_w$ (D) | MP    | $M_z$ (D) | $M_z + 1$ (D) | PDI      |
|-----------|-----------|-------|-----------|---------------|----------|
| 18079     | 38266     | 32333 | 69065     | 102692        | 2.116577 |

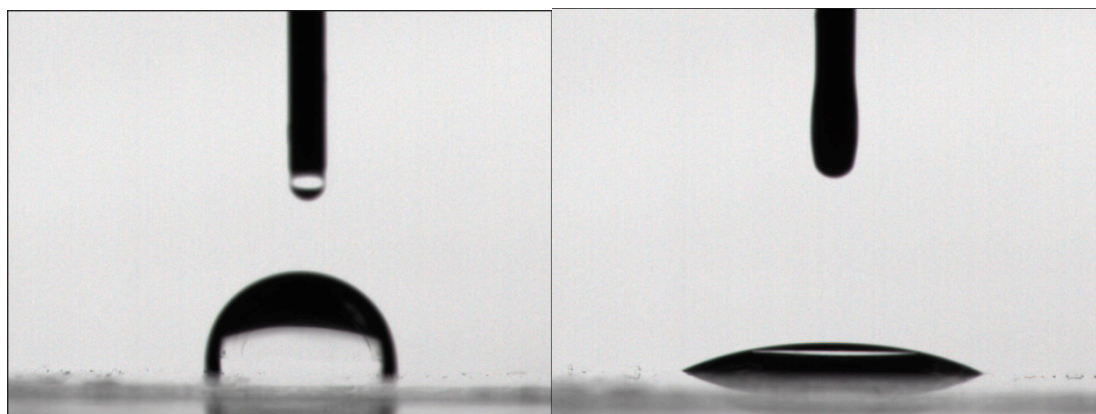

Figure S47. Contact Angle with Water and n-Hexadecane.

#### 24. Compound of Poly(5-co-OMA) (1:8)

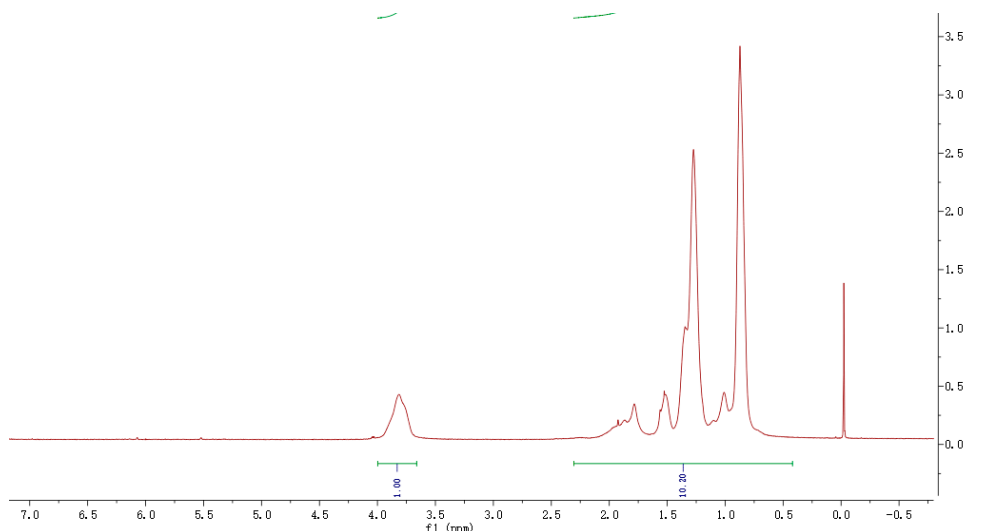

Figure S48.  $^1\text{H}$  NMR ( $\text{CDCl}_3$ , 400 MHz).

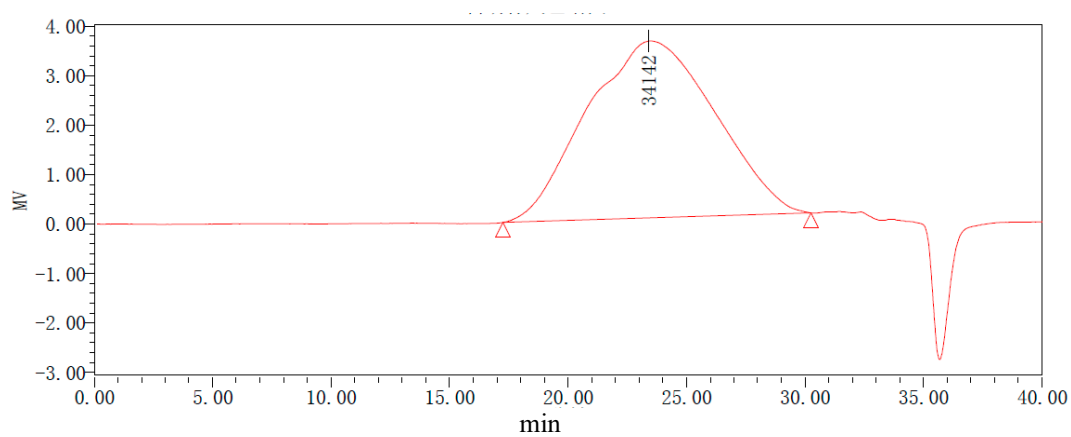

Table S22. GPC results.

| $M_n$ (D) | $M_w$ (D) | MP    | $M_z$ (D) | $M_z + 1$ (D) | PDI      |
|-----------|-----------|-------|-----------|---------------|----------|
| 19372     | 56644     | 34142 | 133017    | 222816        | 2.924048 |

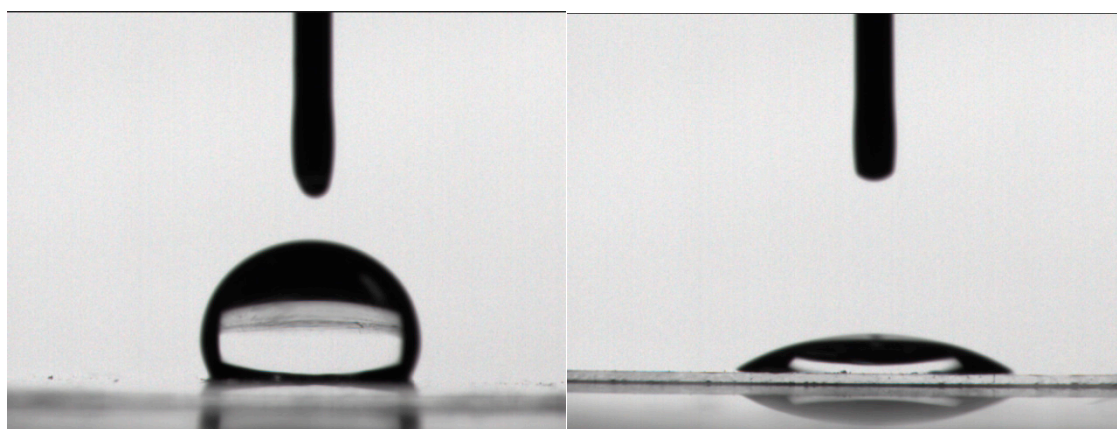

Figure S49. Contact Angle with Water and n-Hexadecane.



25. Compound of Poly(5-co-OMA) (1:6)

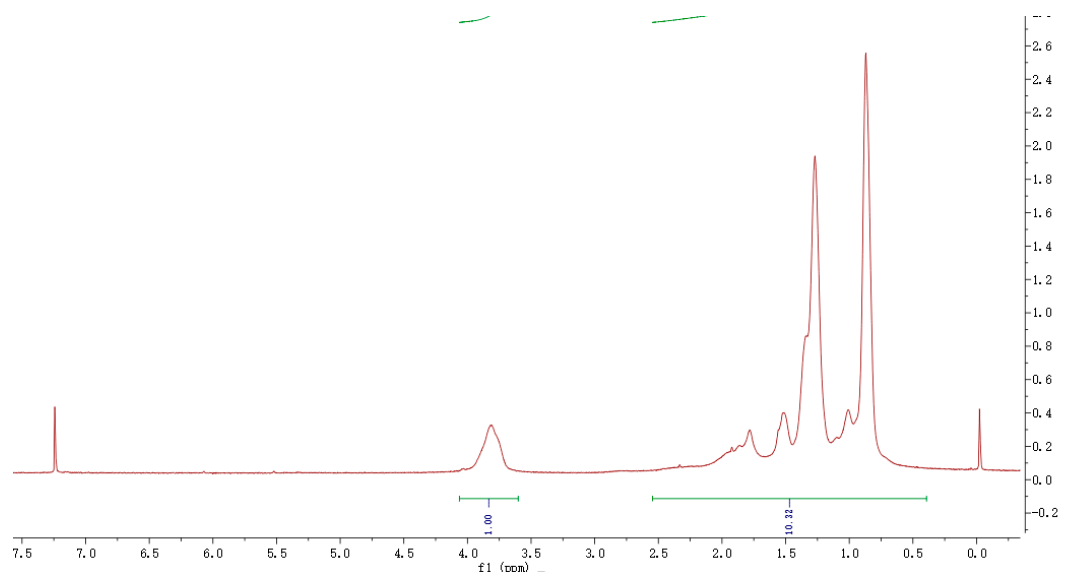

Figure S50.  $^1\text{H}$  NMR ( $\text{CDCl}_3$ , 400 MHz).

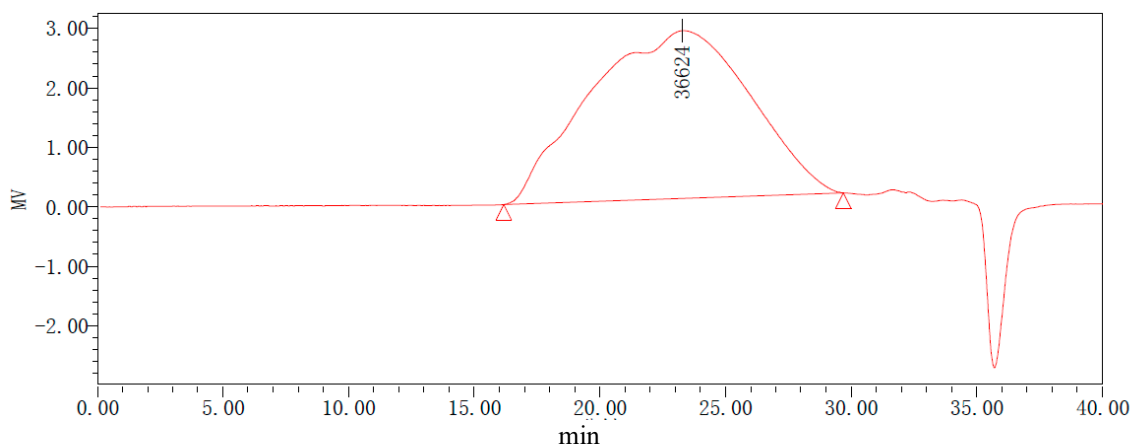

Table S23. GPC results.

| $M_n$ (D) | $M_w$ (D) | MP    | $M_z$ (D) | $M_z + 1$ (D) | PDI      |
|-----------|-----------|-------|-----------|---------------|----------|
| 24889     | 102840    | 36624 | 315148    | 564801        | 4.131881 |

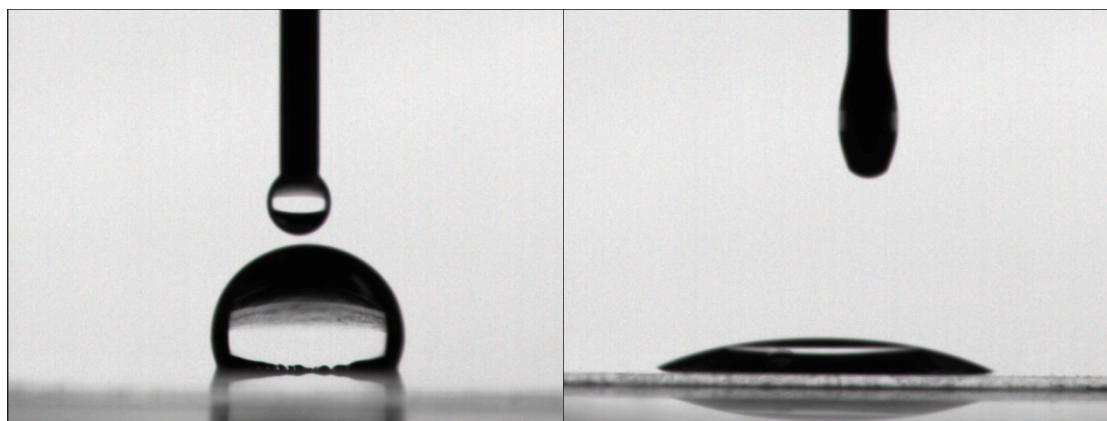

Figure S51. Contact Angle with Water and n-Hexadecane.

26. Compound of Poly(5-co-OMA) (1:2)

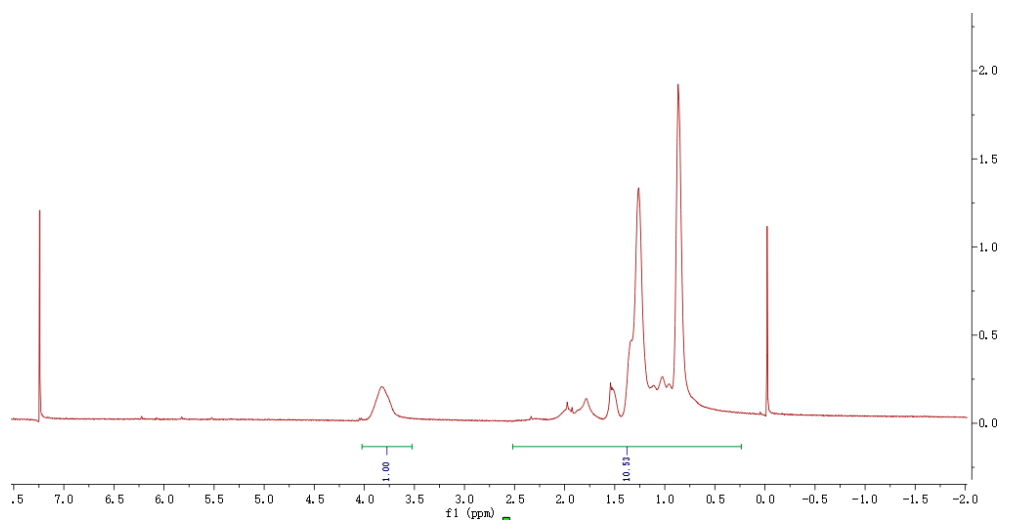

Figure S52. <sup>1</sup>H NMR (CDCl<sub>3</sub>, 400 MHz).

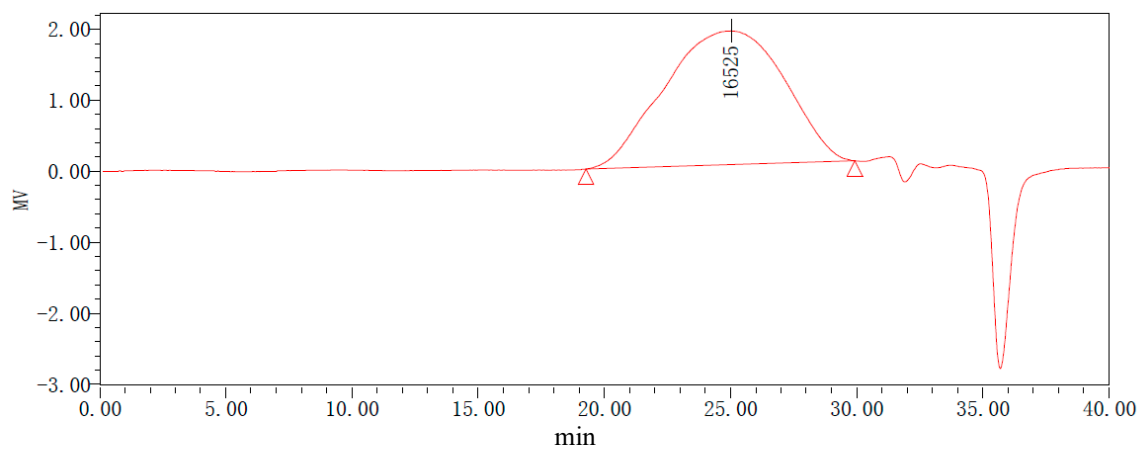

Table S24. GPC results.

| $M_n$ (D) | $M_w$ (D) | MP    | $M_z$ (D) | $M_z + 1$ (D) | PDI      |
|-----------|-----------|-------|-----------|---------------|----------|
| 13677     | 28256     | 16525 | 54506     | 83455         | 2.066034 |

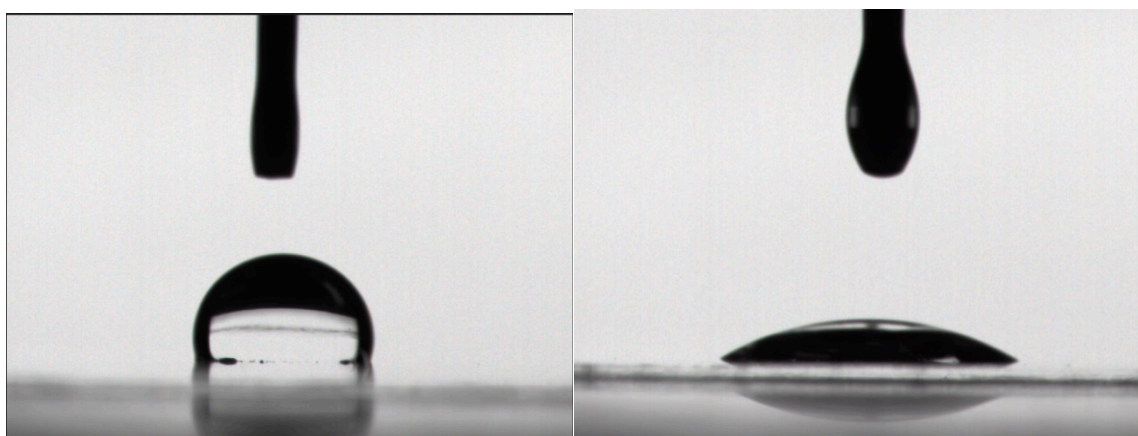

Figure S53. Contact Angle with Water and n-Hexadecane.

27. Compound of Poly(5-co-OMA) (1:1)

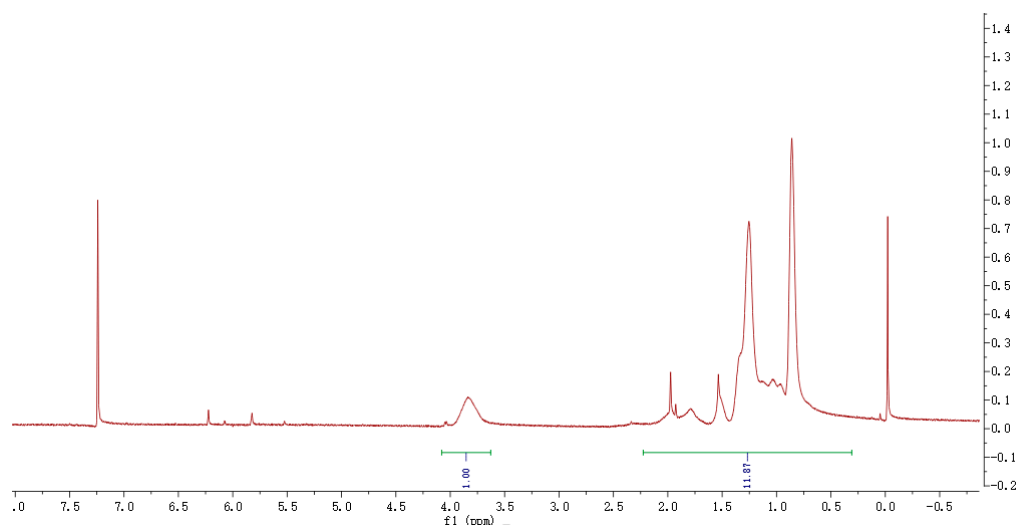

Figure S54.  $^1\text{H}$  NMR ( $\text{CDCl}_3$ , 400 MHz).

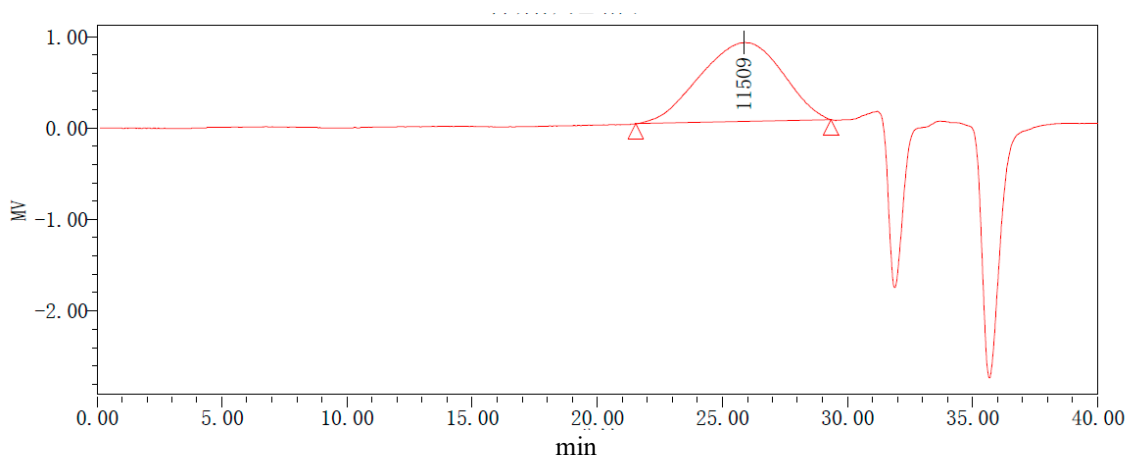

Table S25. GPC results.

| $M_n$ (D) | $M_w$ (D) | MP    | $M_z$ (D) | $M_z + 1$ (D) | PDI      |
|-----------|-----------|-------|-----------|---------------|----------|
| 10396     | 15011     | 11509 | 21769     | 29876         | 1.444013 |

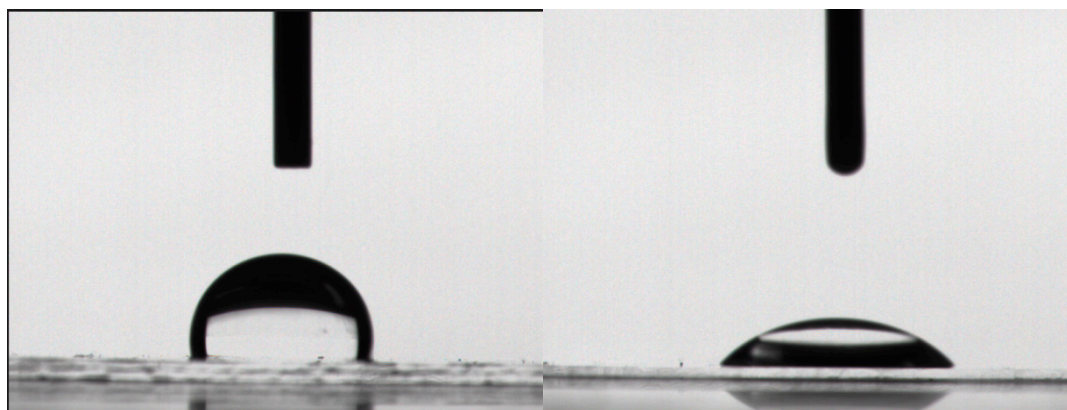

Figure S55. Contact Angle with Water and n-Hexadecane.

28. Compound of Poly(5-co-LMA) (1:15)

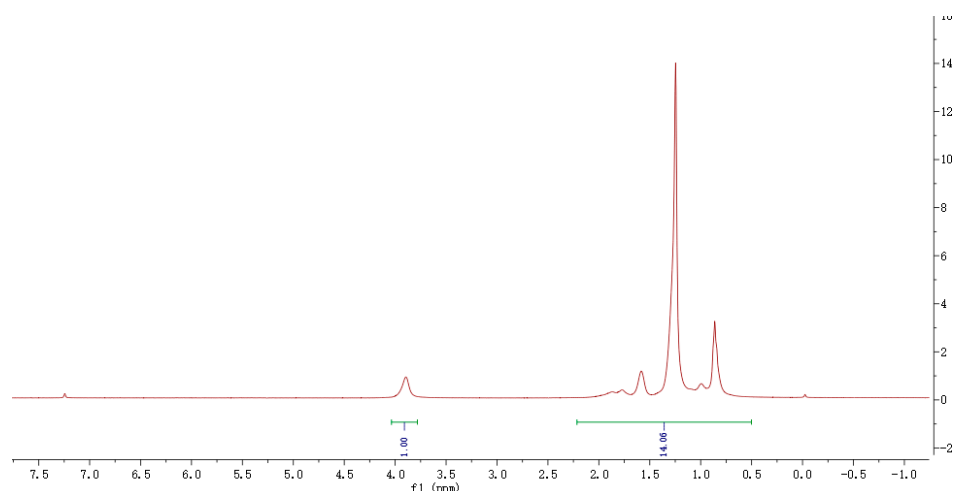

Figure S56.  $^1\text{H}$  NMR ( $\text{CDCl}_3$ , 400 MHz).

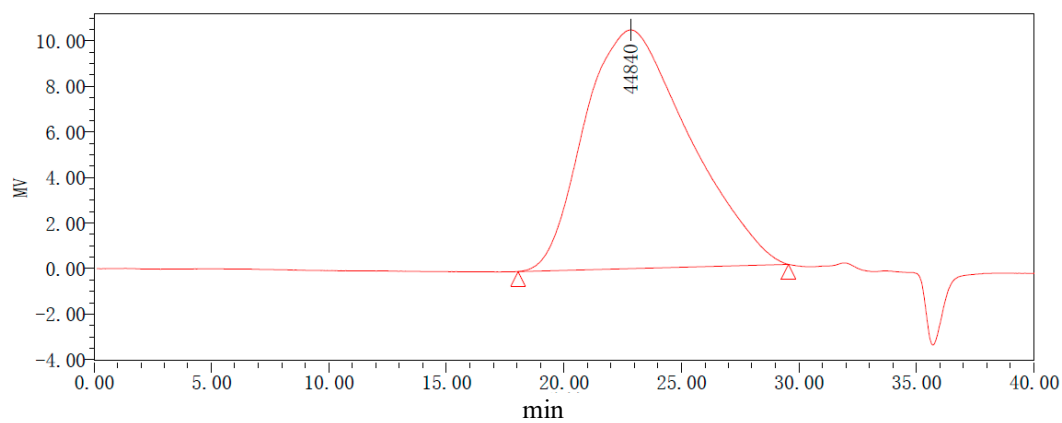

Table S26. GPC results.

| $M_n$ (D) | $M_w$ (D) | MP    | $M_z$ (D) | $M_z + 1$ (D) | PDI      |
|-----------|-----------|-------|-----------|---------------|----------|
| 23063     | 51761     | 44840 | 91655     | 132066        | 2.244307 |

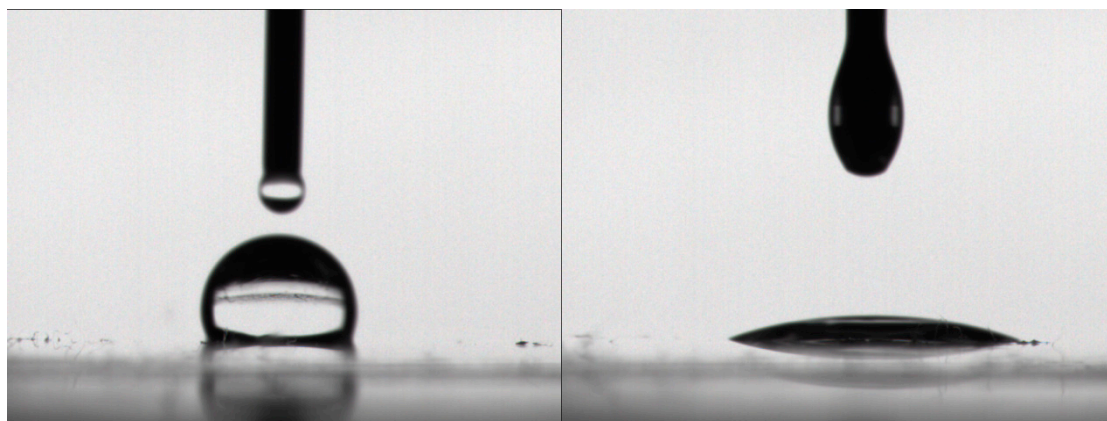

Figure S57. Contact Angle with Water and n-Hexadecane.

29. Compound of Poly(5-co-LMA) (1:8)

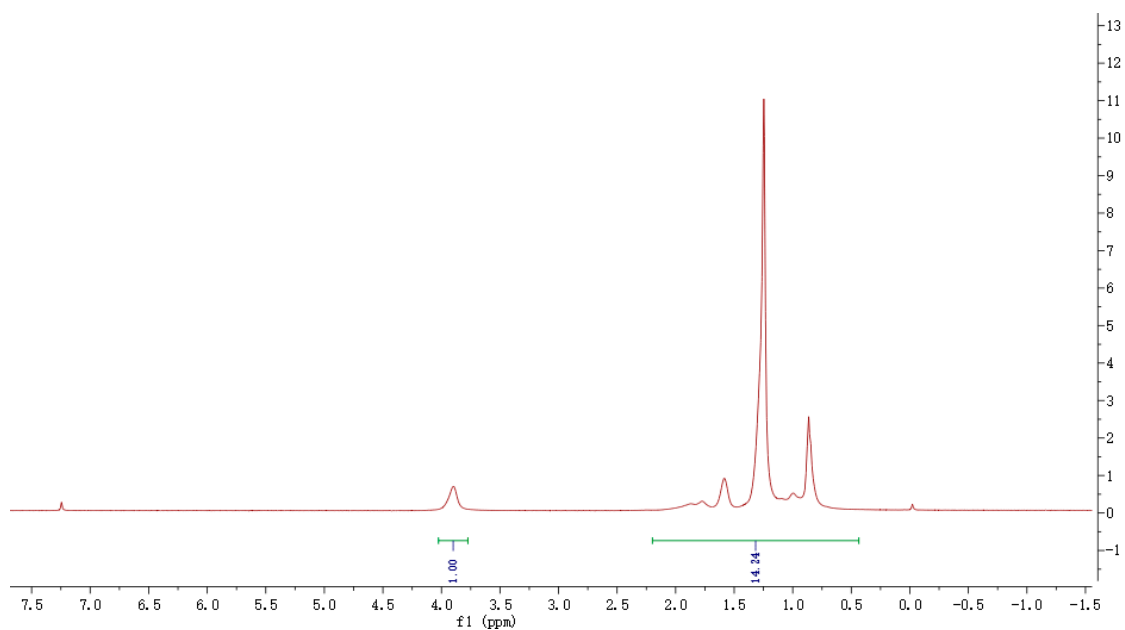

Figure S58.  $^1\text{H}$  NMR ( $\text{CDCl}_3$ , 400 MHz).

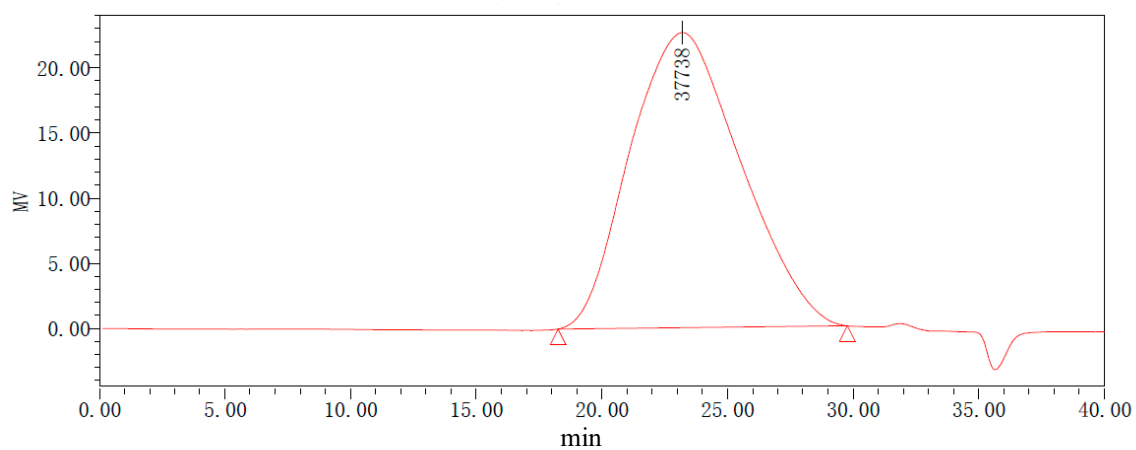

Table S27. GPC results.

| $M_n$ (D) | $M_w$ (D) | MP    | $M_z$ (D) | $M_z + 1$ (D) | PDI      |
|-----------|-----------|-------|-----------|---------------|----------|
| 22597     | 48628     | 39495 | 87725     | 129197        | 2.151993 |

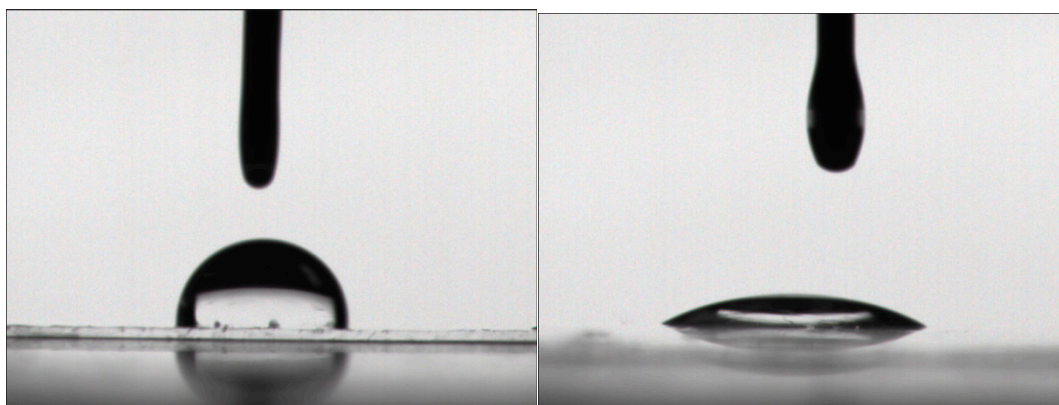

Figure S59. Contact Angle with Water and n-Hexadecane.

30. Compound of Poly(5-co-LMA) (1:6)

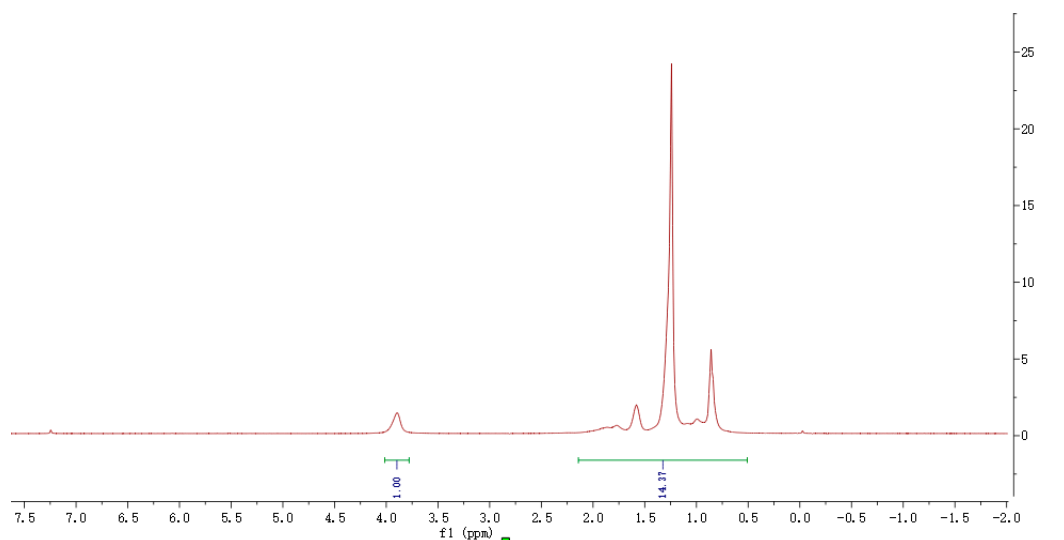

Figure S60. <sup>1</sup>H NMR (CDCl<sub>3</sub>, 400 MHz).

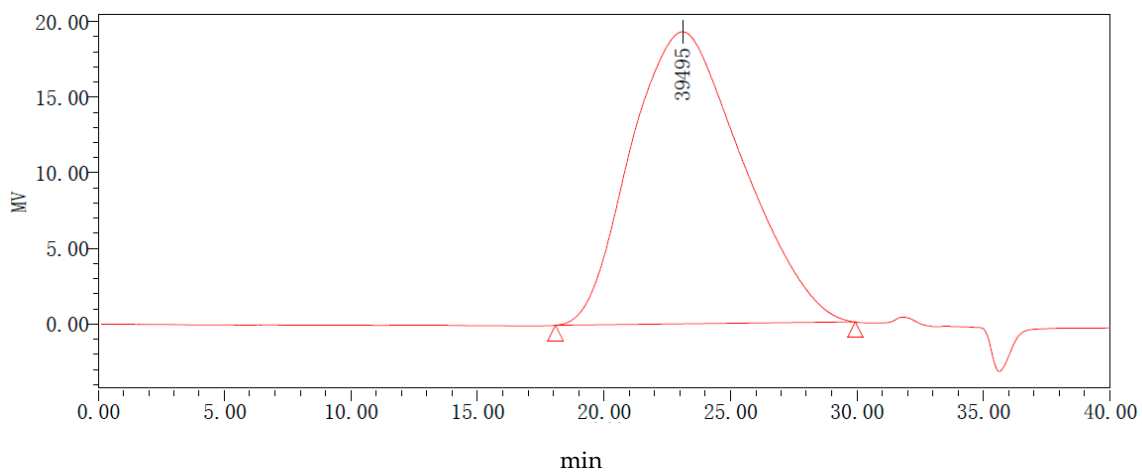

Table S28. GPC results.

| $M_n$ (D) | $M_w$ (D) | MP    | $M_z$ (D) | $M_z + 1$ (D) | PDI      |
|-----------|-----------|-------|-----------|---------------|----------|
| 22431     | 49283     | 39495 | 88874     | 130985        | 2.197061 |

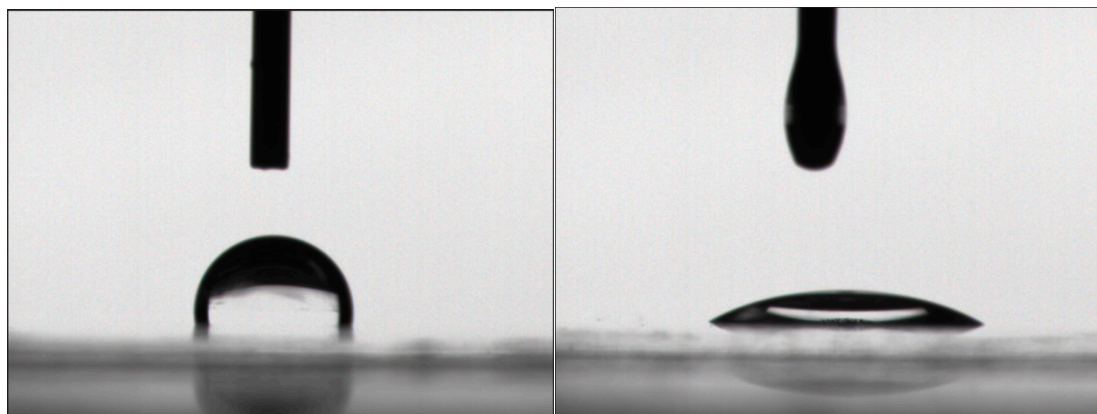

Figure S61. Contact Angle with Water and n-Hexadecane.

31. Compound of Poly(5-co-LMA) (1:2)

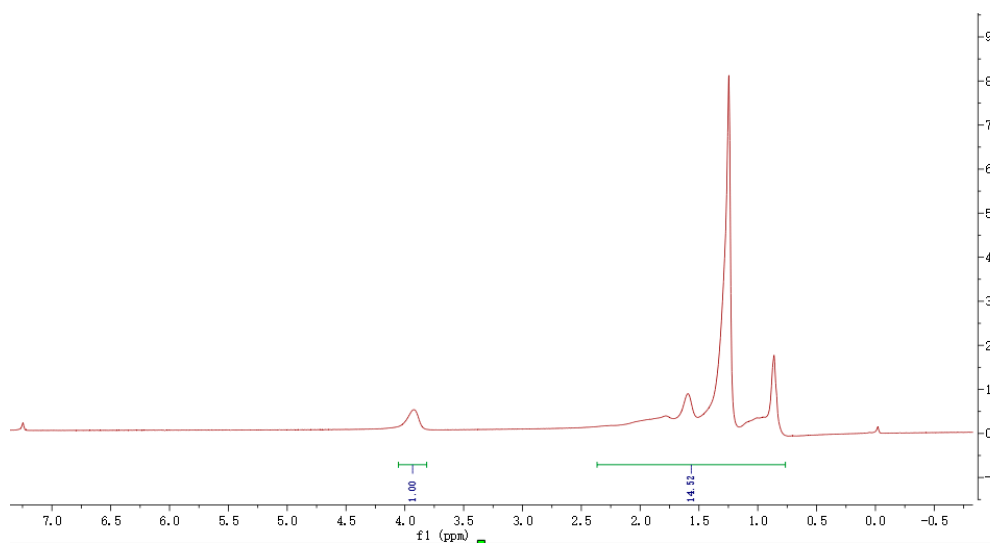

Figure S62. <sup>1</sup>H NMR (CDCl<sub>3</sub>, 400 MHz).

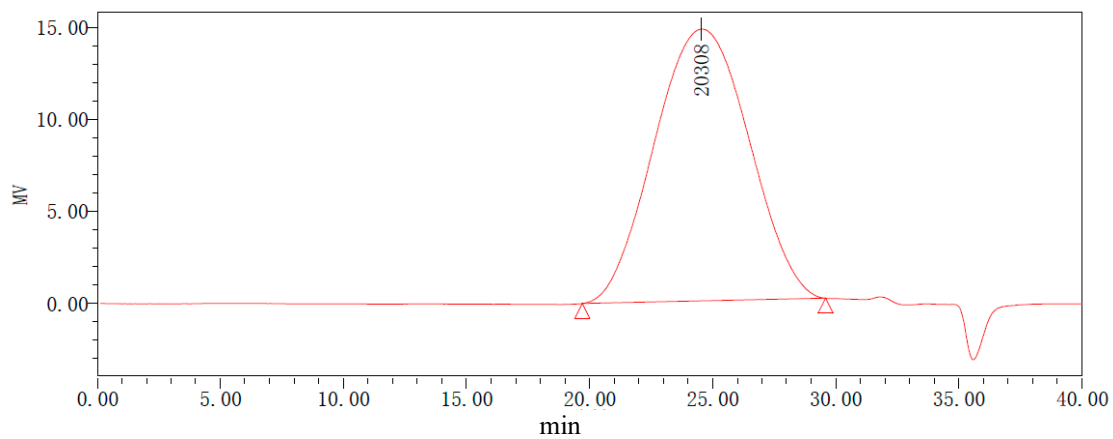

Table S29. GPC results.

| $M_n$ (D) | $M_w$ (D) | MP    | $M_z$ (D) | $M_z + 1$ (D) | PDI      |
|-----------|-----------|-------|-----------|---------------|----------|
| 15746     | 26784     | 20308 | 43939     | 64006         | 1.701009 |

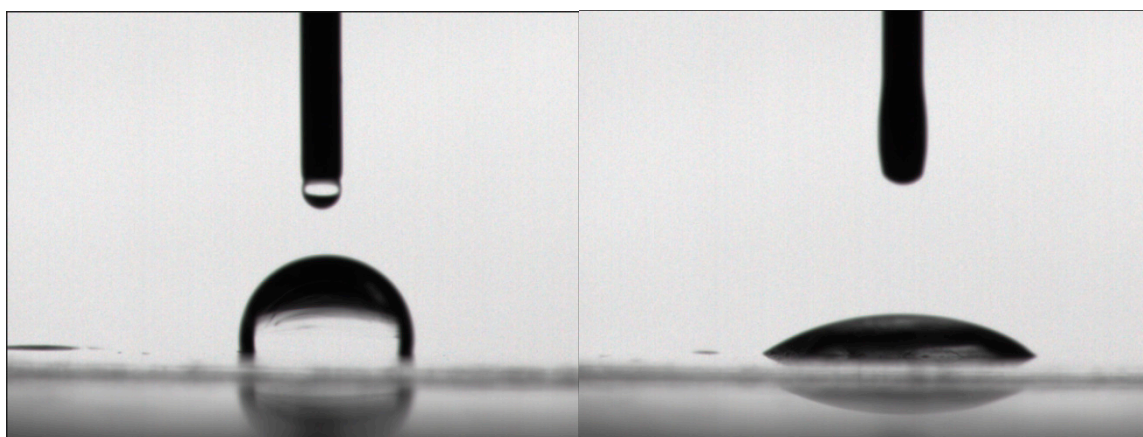

Figure S63. Contact Angle with Water and n-Hexadecane.

32. Compound of Poly(5-co-LMA) (1:1)

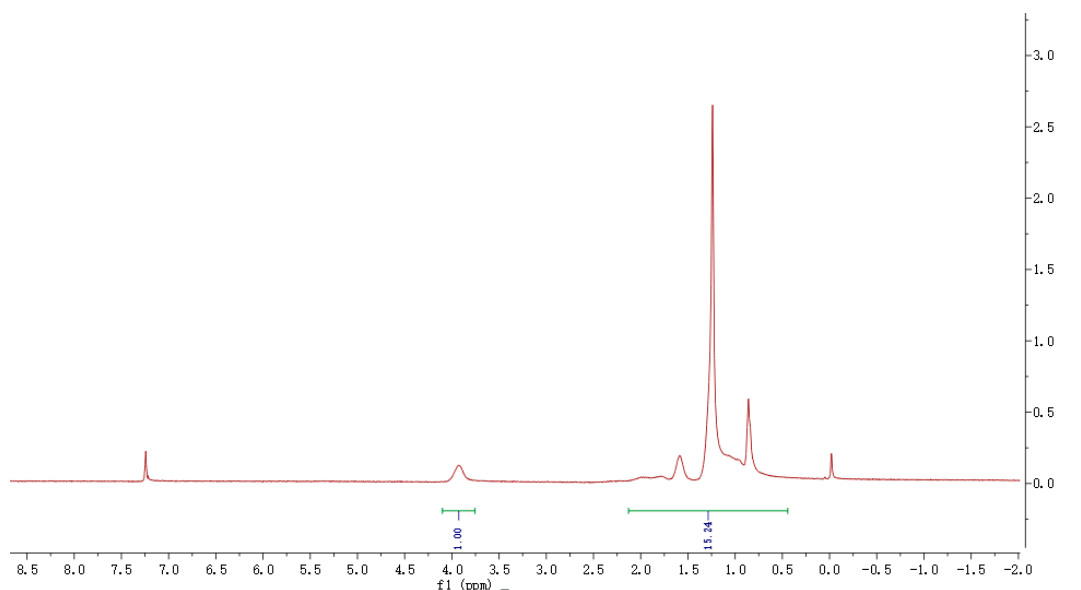

Figure S64. <sup>1</sup>H NMR (CDCl<sub>3</sub>, 400 MHz).

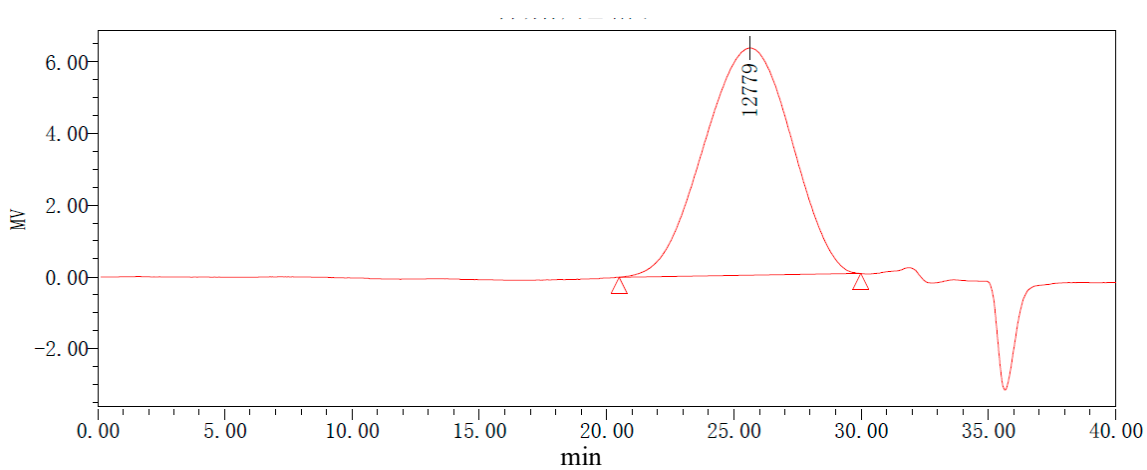

Table S30. GPC results.

| $M_n$ (D) | $M_w$ (D) | MP    | $M_z$ (D) | $M_z + 1$ (D) | PDI      |
|-----------|-----------|-------|-----------|---------------|----------|
| 10982     | 16759     | 12779 | 25942     | 38398         | 1.526041 |

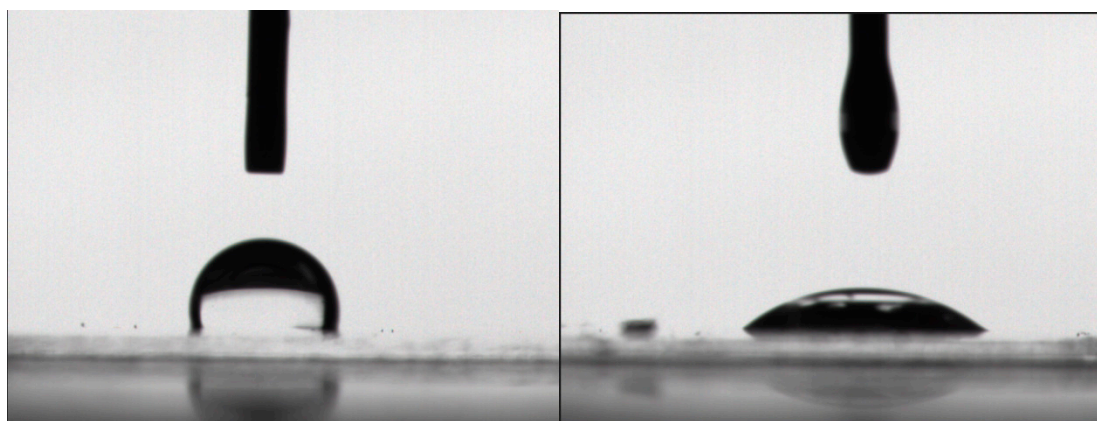

Figure S65. Contact Angle with Water and n-Hexadecane.



33. Compound of Poly(5-co-SMA) (1:15)

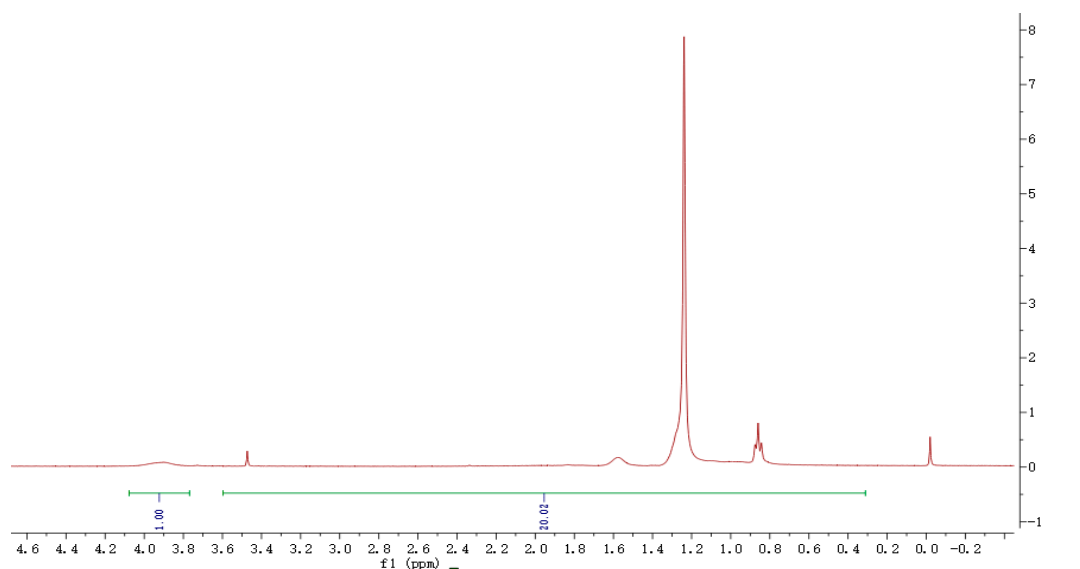

Figure S66. <sup>1</sup>H NMR (CDCl<sub>3</sub>, 400 MHz).

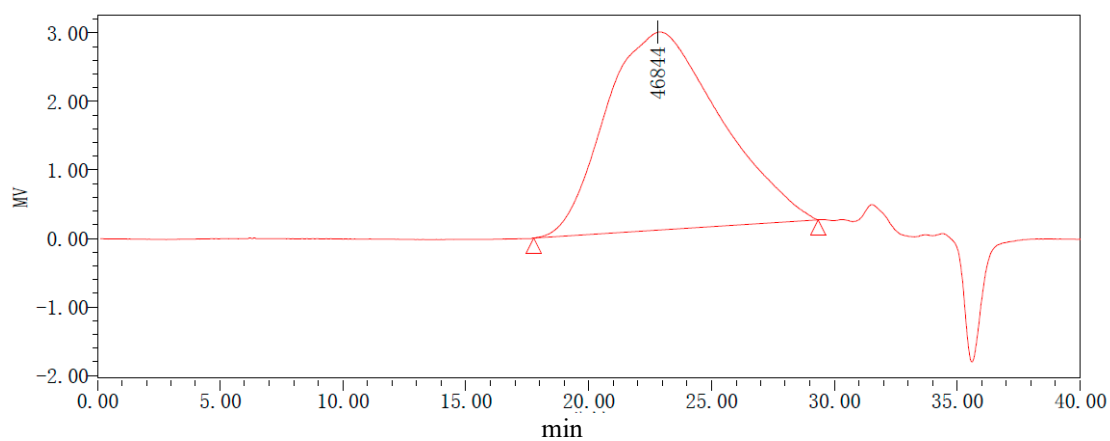

Table S31. GPC results.

| $M_n$ (D) | $M_w$ (D) | MP     | $M_z$ (D) | $M_z + 1$ (D) | PDI      |
|-----------|-----------|--------|-----------|---------------|----------|
| 24,473    | 59,055    | 46,844 | 111,660   | 166,563       | 2.413054 |

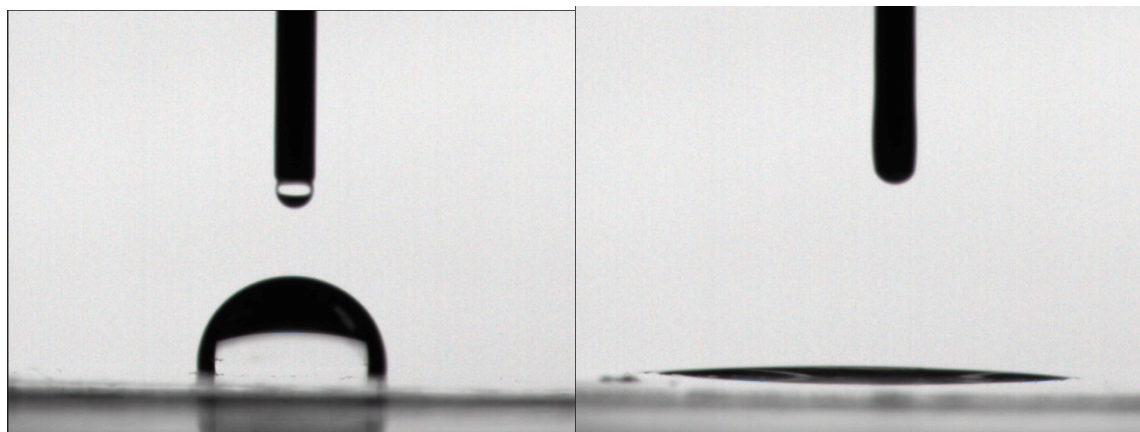

Figure S67. Contact Angle with Water and n-Hexadecane.

34. Compound of Poly(5-co-SMA) (1:8)

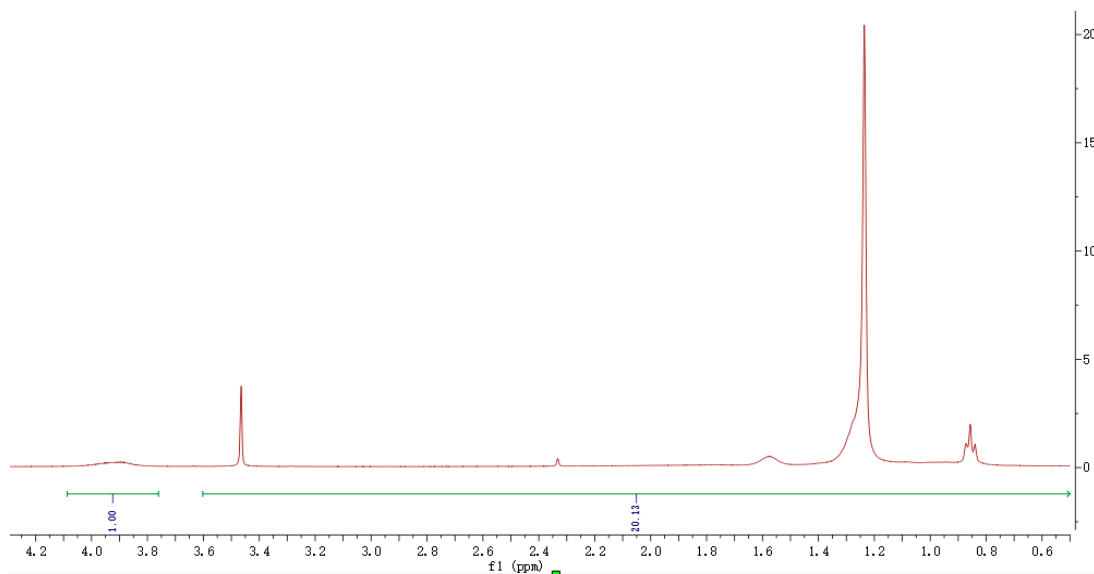

Figure S68. <sup>1</sup>H NMR (CDCl<sub>3</sub>, 400 MHz).

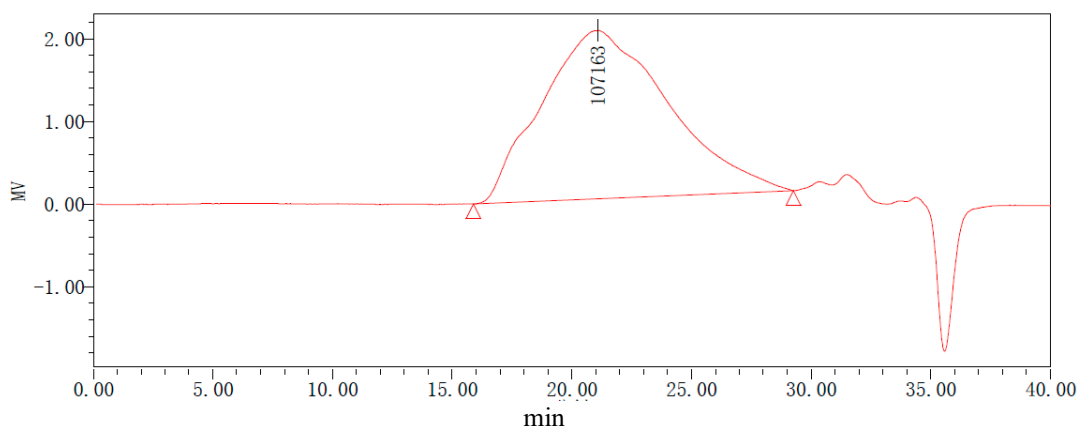

Table S32. GPC results.

| $M_n$ (D) | $M_w$ (D) | MP     | $M_z$ (D) | $M_z + 1$ (D) | PDI      |
|-----------|-----------|--------|-----------|---------------|----------|
| 41346     | 156080    | 107163 | 401568    | 704109        | 3.774987 |

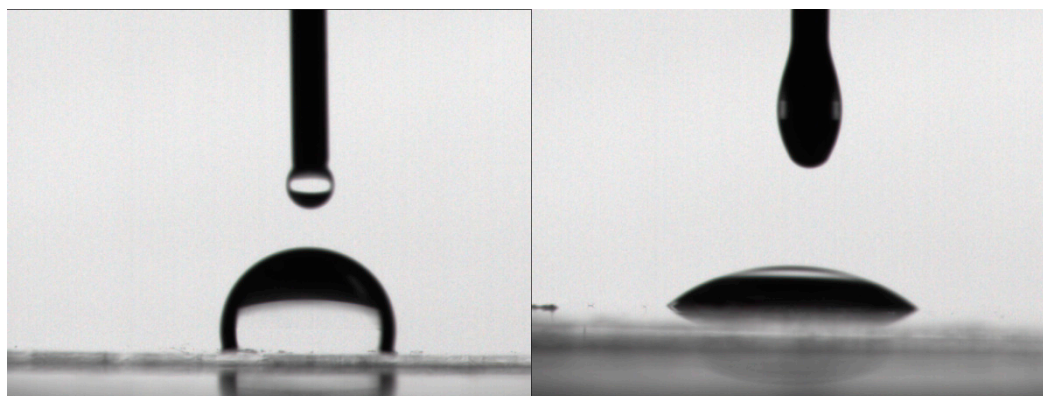

Figure S69. Contact Angle with Water and n-Hexadecane.

35. Compound of Poly(5-co-SMA) (1:6)

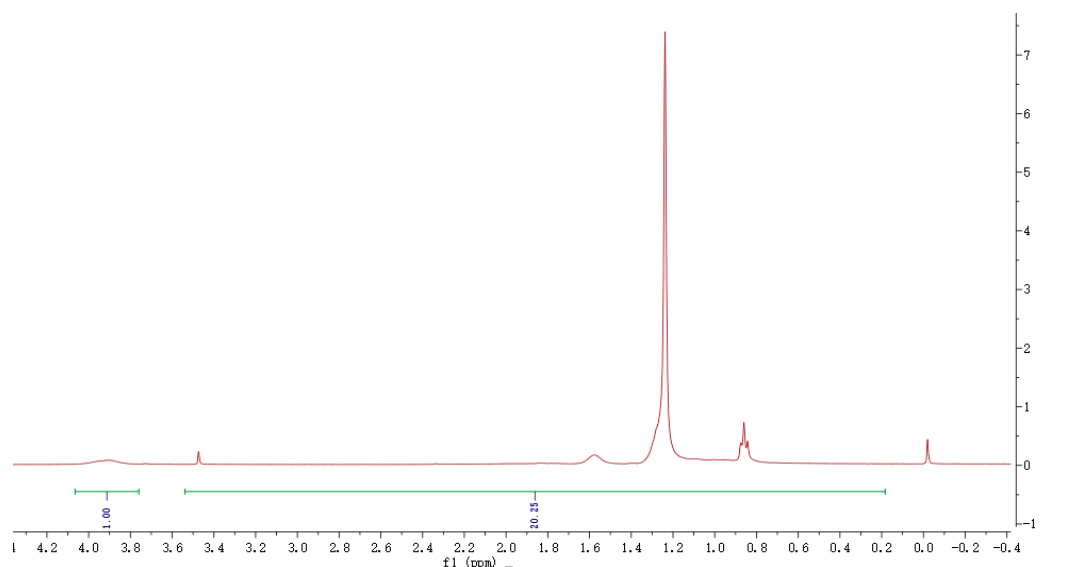

Figure S70. <sup>1</sup>H NMR (CDCl<sub>3</sub>, 400 MHz).

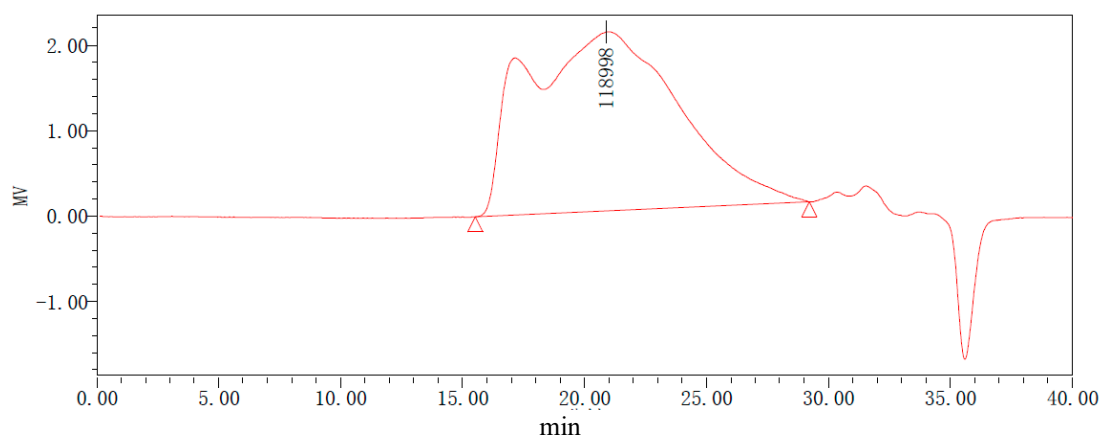

Table S33. GPC results.

| $M_n$ (D) | $M_w$ (D) | MP     | $M_z$ (D) | $M_z + 1$ (D) | PDI      |
|-----------|-----------|--------|-----------|---------------|----------|
| 51258     | 282544    | 118998 | 814452    | 1282245       | 5.512205 |

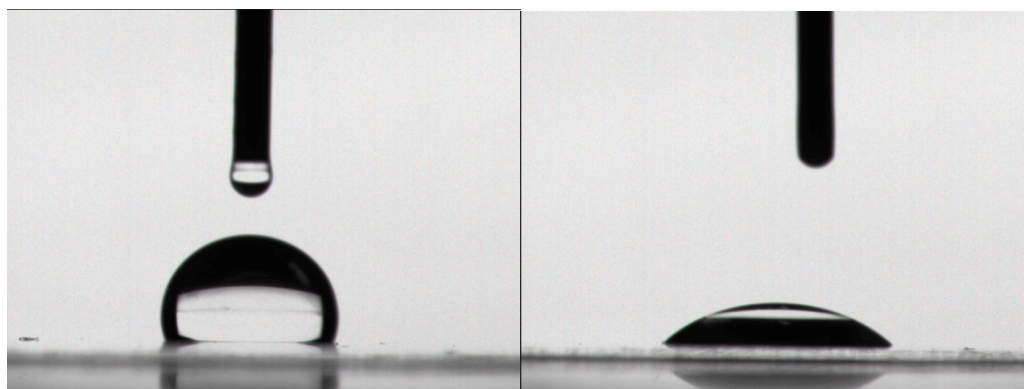

Figure S71. Contact Angle with Water and n-Hexadecane.

36. Compound of Poly(5-co-SMA) (1:2)

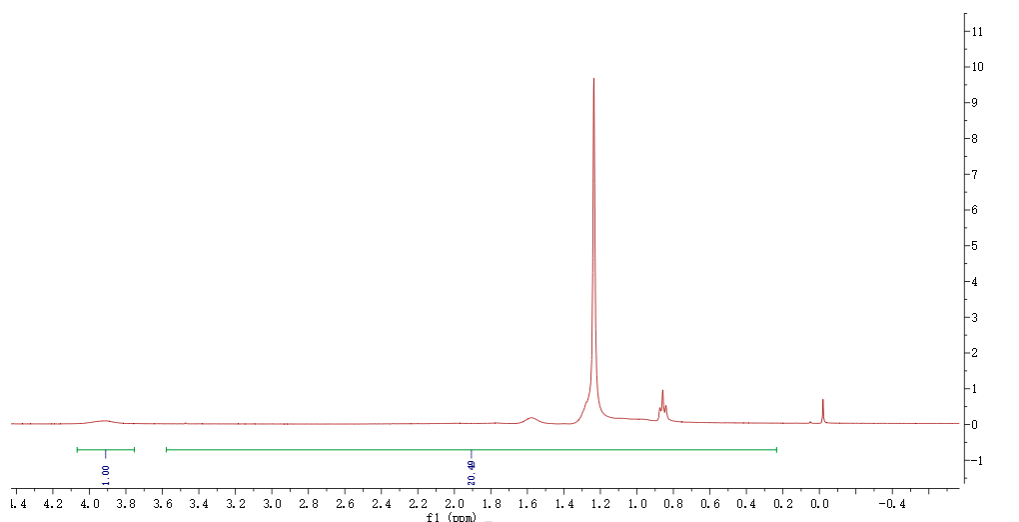

Figure S72. <sup>1</sup>H NMR (CDCl<sub>3</sub>, 400 MHz).

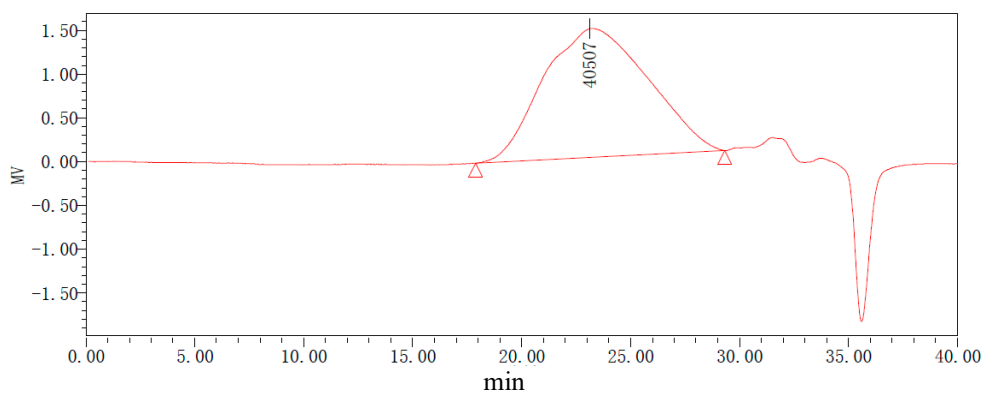

Table S34. GPC results.

| $M_n$ (D) | $M_w$ (D) | MP    | $M_z$ (D) | $M_z + 1$ (D) | PDI      |
|-----------|-----------|-------|-----------|---------------|----------|
| 22274     | 52870     | 40507 | 104719    | 160683        | 2.373591 |

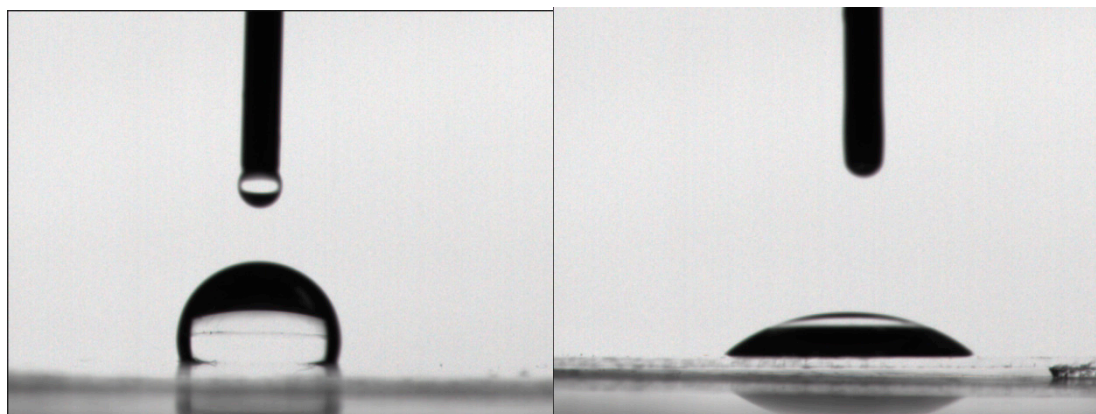

Figure S73. Contact Angle with Water and n-Hexadecane.

37. Compound of Poly(5-co-SMA) (1:1)

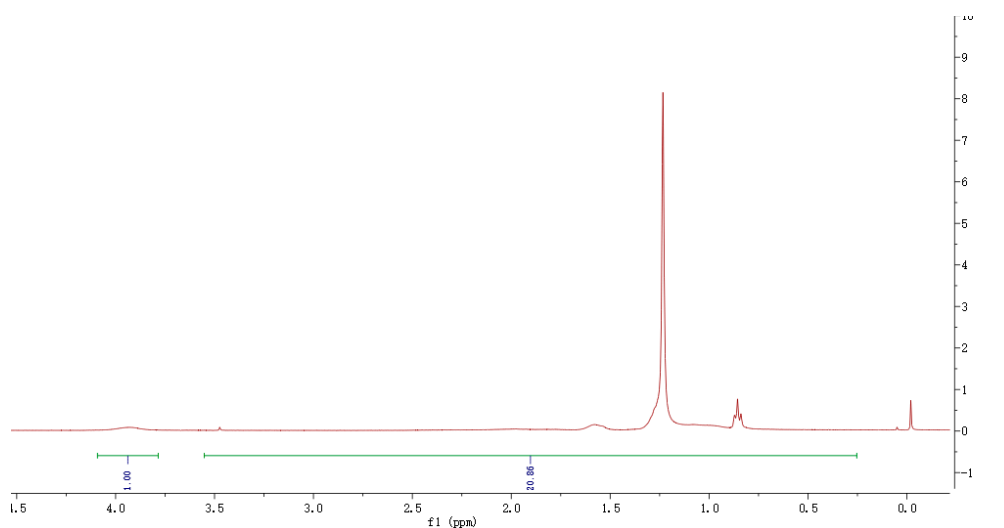

Figure S74. <sup>1</sup>H NMR (CDCl<sub>3</sub>, 400 MHz).

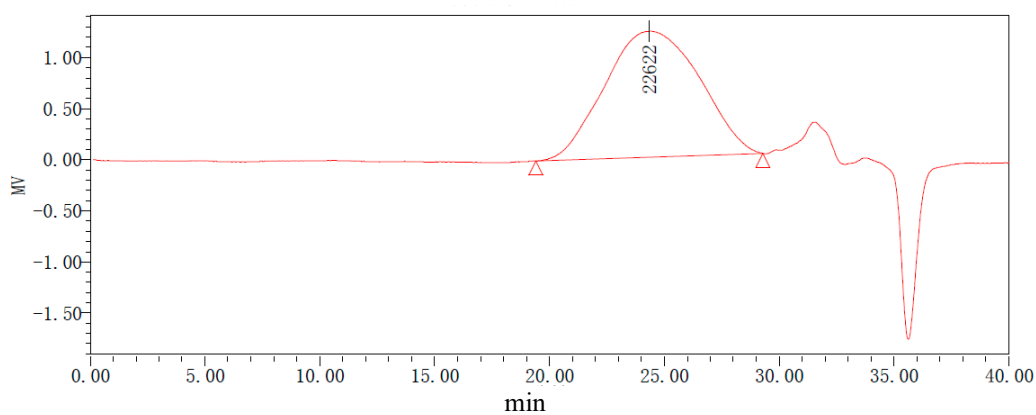

Table S35. GPC results.

| $M_n$ (D) | $M_w$ (D) | MP    | $M_z$ (D) | $M_z + 1$ (D) | PDI      |
|-----------|-----------|-------|-----------|---------------|----------|
| 16315     | 29509     | 22622 | 51433     | 77091         | 1.808724 |

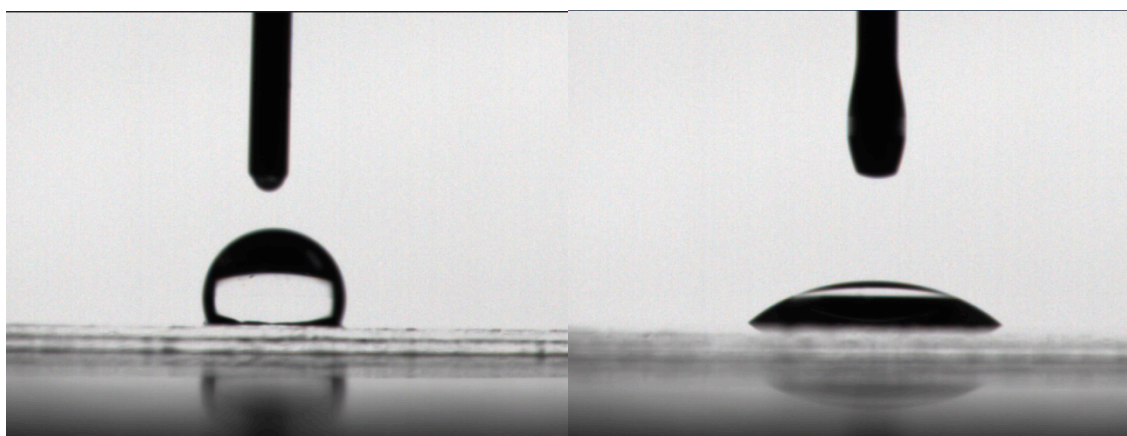

Figure S75. Contact Angle with Water and n-Hexadecane.
